# Supplementary material for: Synthesis of an unusual quinazoline alkaloid: theoretical and experimental investigations of its structural, electronic, molecular and biological properties
Source: Royal Society of Chemistry journal article supplement (doi:10.1039/c8ra00138c), 2018-01-01
Supplement: c8ra00138c1.pdf [file c8ra00138c1.pdf]

## Synthesis of an unusual Quinazoline alkaloid: Theoretical and Experimental Investigations of its Structural, Electronic, Molecular and Biological properties

Shabir H. Lone<sup>a\*</sup>, Salman Jameel<sup>b,1</sup>, Muzzaffar A. Bhat<sup>c,1</sup>, Rayees A. Lone<sup>b</sup>, Raymond J. Butcher<sup>d</sup>,  
Khursheed A. Bhat<sup>b,\*</sup>,

*Department of Chemistry, Govt Degree College, Anantnag, Kashmir, India, 192101*

*<sup>b</sup>Bioorganic Chemistry Division, Indian Institute of Integrative Medicine, Sanatnagar Srinagar, Kashmir, India  
190005,*

*<sup>c</sup>Department of Chemistry, Islamic University of Science and Technology, Awantipora, Kashmir, 192122, India.*

*<sup>d</sup>Department of Chemistry, Howard University, Washington, DC 20059, USA*

\*Shabir Hussain Lone

Assistant Professor

*Department of Chemistry*

*Govt Degree College, Anantnag, Kashmir, India, 192101*

Email: [lone.shabir480@gmail.com](mailto:lone.shabir480@gmail.com)

\*Khursheed Ahmad Bhat

Senior Scientist

*Bioorganic Chemistry Division*

*Indian Institute of Integrative Medicine, Sanatnagar, Srinagar, Kashmir, India, 190005*

Email: [kabhat@iiim.ac.in](mailto:kabhat@iiim.ac.in)

<sup>1</sup> Both the authors contributed equally.

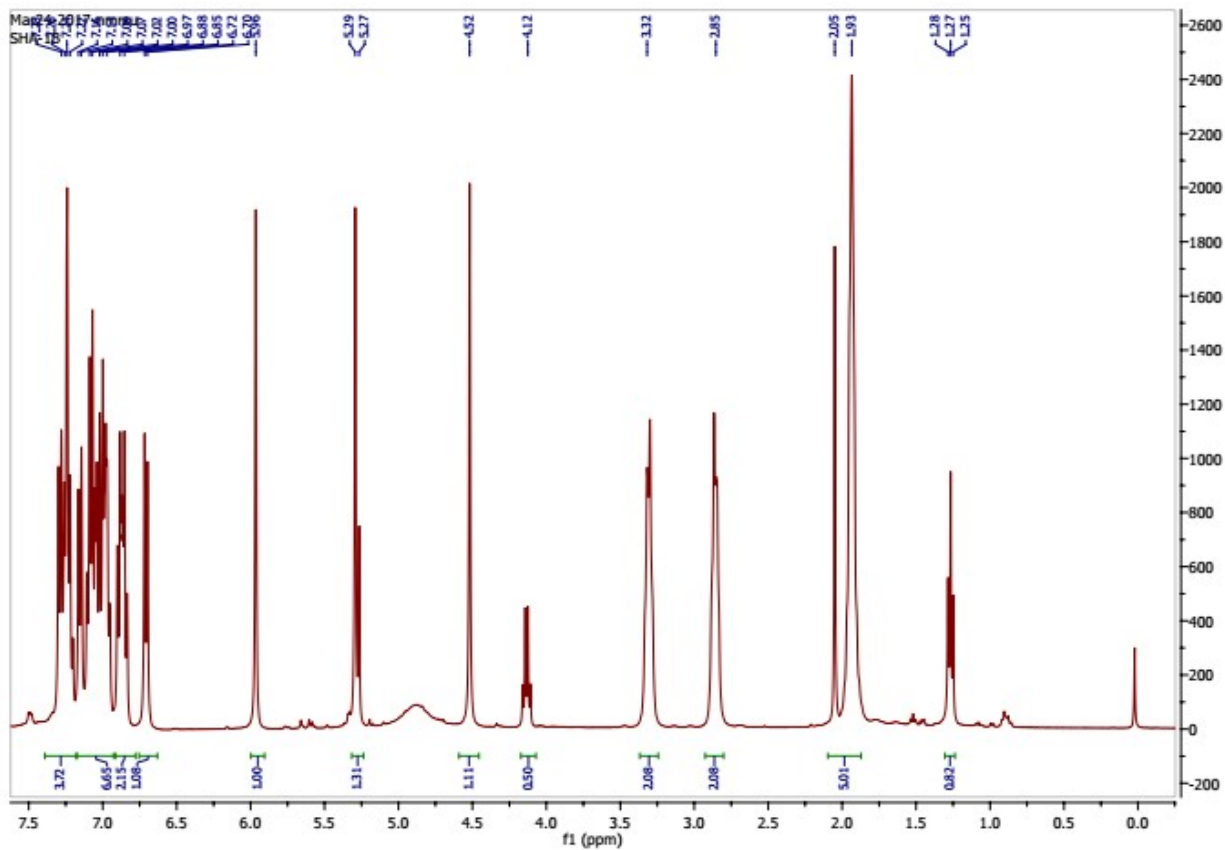

Fig. S1 Experimental  $^1\text{H}$  NMR of Compound 1

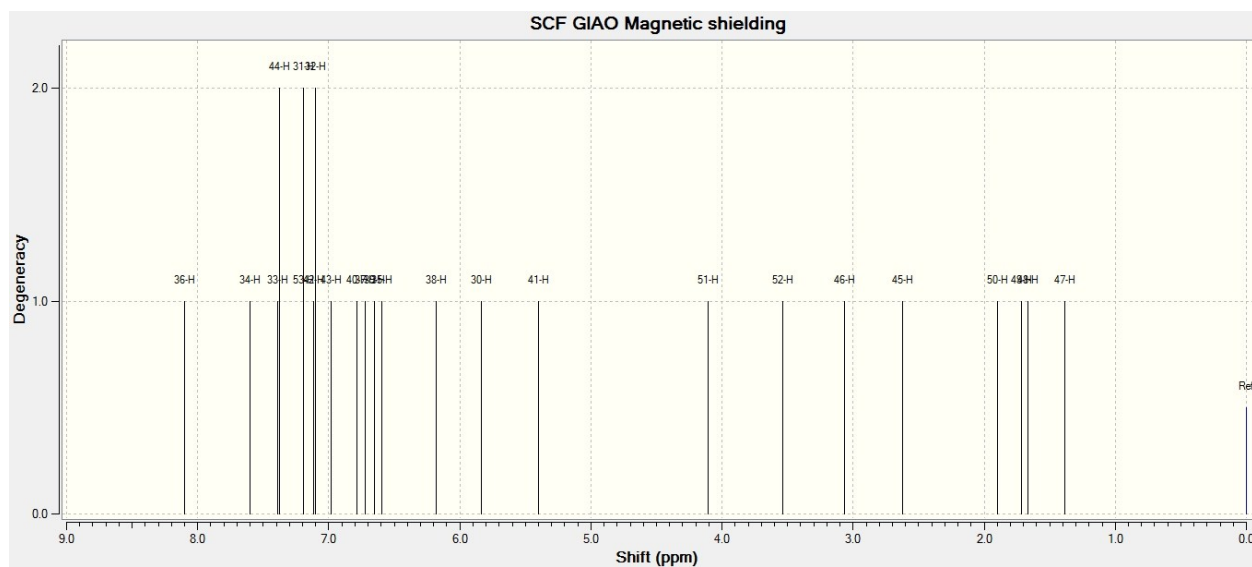

**Fig. S2** Theoretical  $^1\text{H}$  NMR of Compound **1**

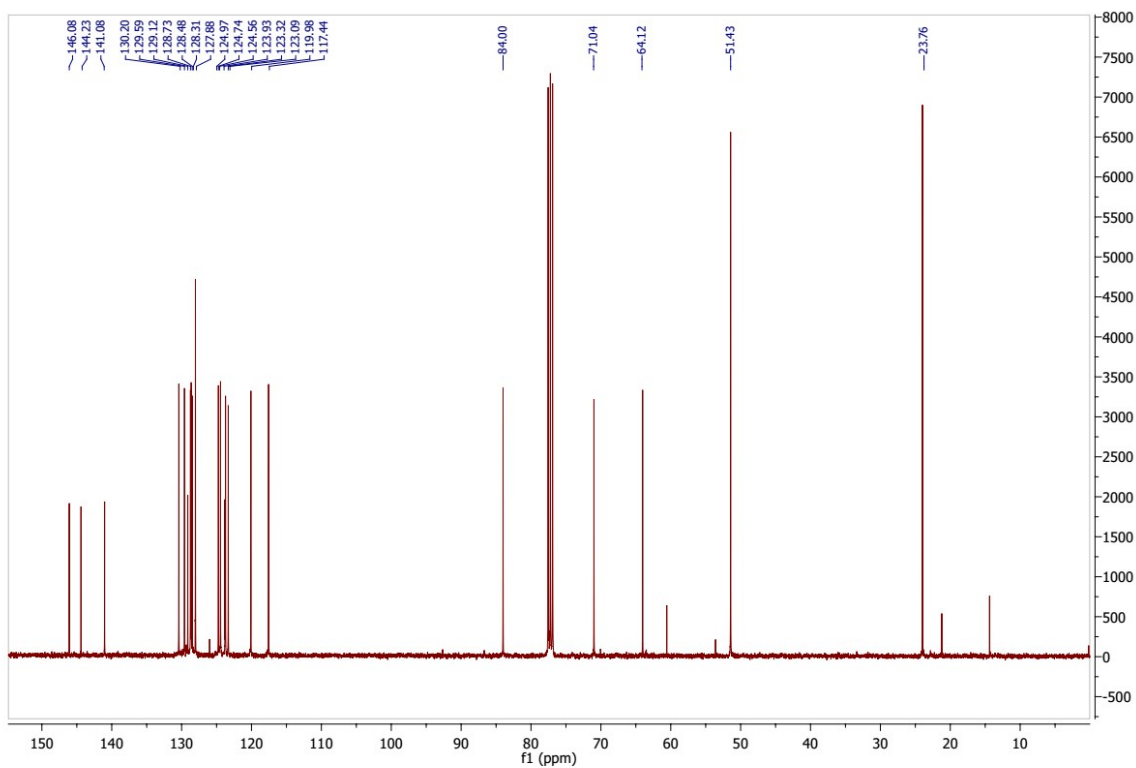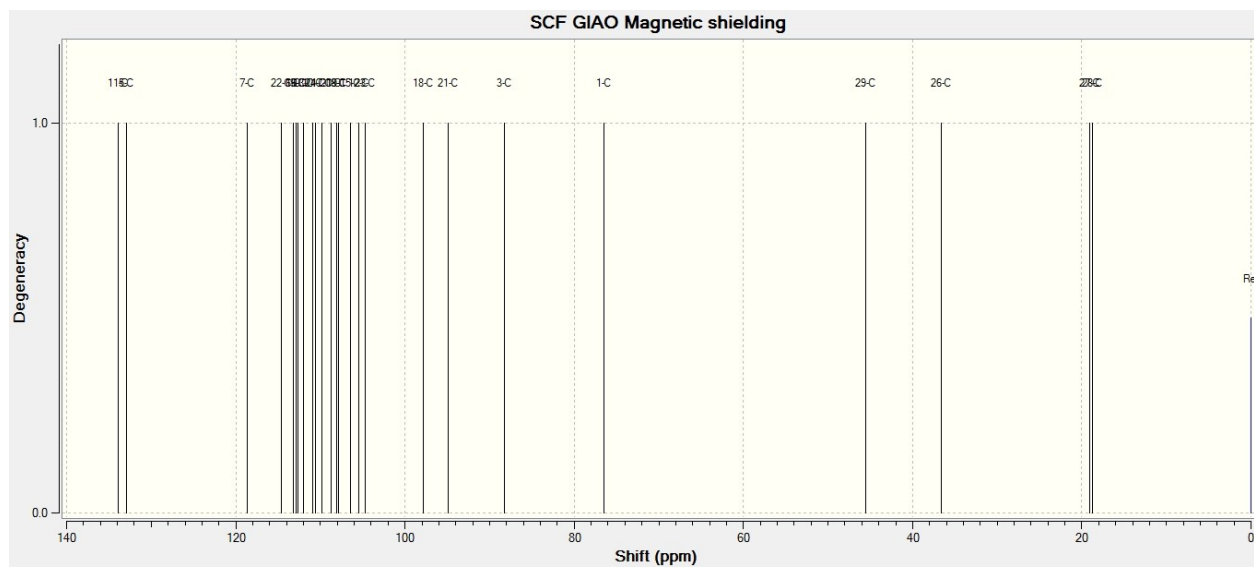

**Fig. S3** Experimental  $^{13}\text{C}$  NMR of Compound **1**

**Fig. S4** Theoretical  $^{13}\text{C}$  NMR of Compound **1**

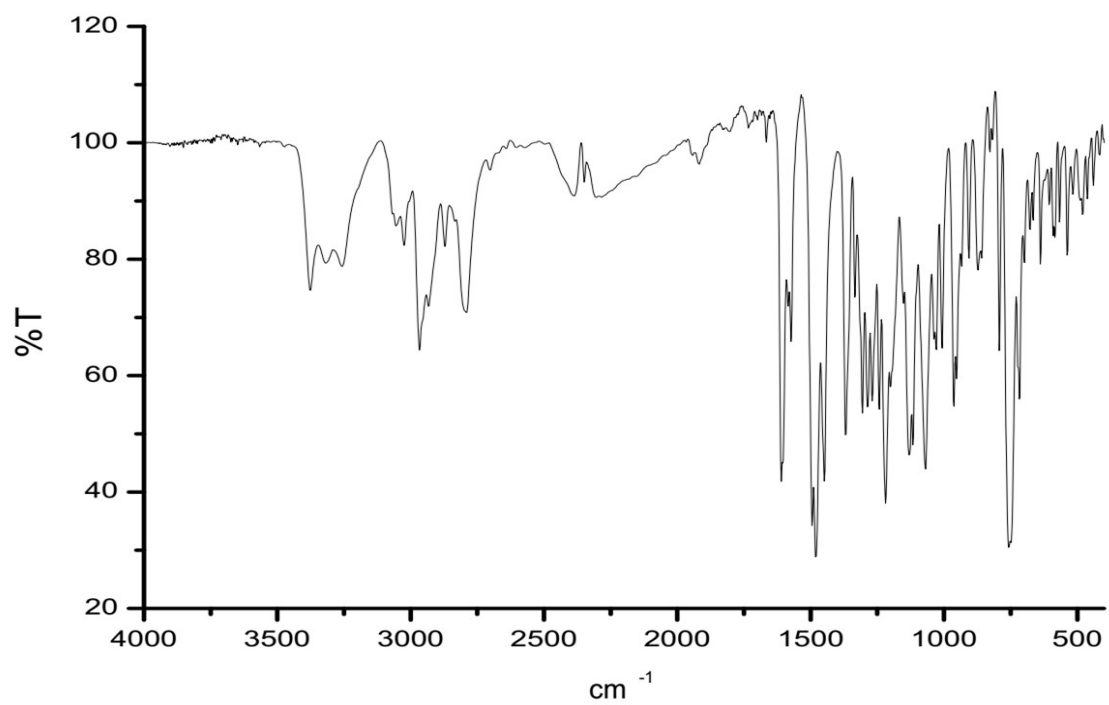

**Fig. S5** Experimental FT-IR of Compound **1**

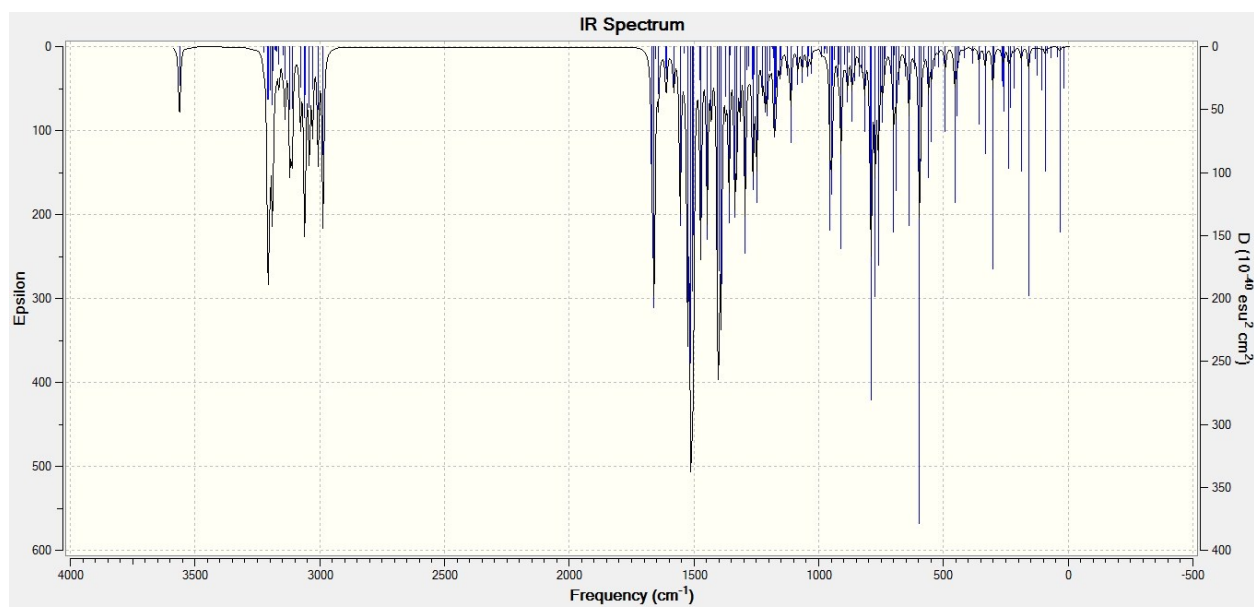

**Fig. S6** Theoretical FT-IR of Compound **1****Table S1.** Atomic coordinates ( $\times 10^4$ ) and equivalent isotropic displacement parameters ( $\text{\AA}^2 \times 10^3$ ) for **1**.  $U(\text{eq})$  is defined as one third of the trace of the orthogonalized  $U^{ij}$  tensor.

|        | x        | y       | z       | $U(\text{eq})$ |
|--------|----------|---------|---------|----------------|
| N(1A)  | 1272(2)  | 3353(2) | 1652(1) | 26(1)          |
| N(2A)  | 1165(2)  | 2427(2) | 767(1)  | 24(1)          |
| N(3A)  | 2462(2)  | 3255(2) | 261(1)  | 23(1)          |
| N(4A)  | 2645(2)  | 2038(2) | -454(1) | 26(1)          |
| C(1A)  | 960(3)   | 4174(3) | 1973(2) | 32(1)          |
| C(2A)  | 1018(3)  | 3866(3) | 2605(2) | 41(1)          |
| C(3A)  | 1150(4)  | 2810(3) | 2577(2) | 49(1)          |
| C(4A)  | 864(3)   | 2496(3) | 1935(2) | 36(1)          |
| C(5A)  | 862(2)   | 3320(2) | 1028(1) | 25(1)          |
| C(6A)  | 509(2)   | 2154(2) | 217(1)  | 25(1)          |
| C(7A)  | -508(3)  | 1713(2) | 218(2)  | 32(1)          |
| C(8A)  | -1159(3) | 1430(3) | -304(2) | 39(1)          |
| C(9A)  | -796(3)  | 1568(3) | -828(2) | 39(1)          |
| C(10A) | 213(3)   | 1995(2) | -828(2) | 32(1)          |
| C(11A) | 878(2)   | 2304(2) | -304(1) | 25(1)          |
| C(12A) | 1990(2)  | 2773(2) | -314(1) | 24(1)          |
| C(13A) | 2005(2)  | 4141(2) | 357(1)  | 23(1)          |
| C(14A) | 2339(3)  | 4940(2) | 60(2)   | 28(1)          |
| C(15A) | 1911(3)  | 5808(2) | 118(2)  | 33(1)          |
| C(16A) | 1136(3)  | 5878(2) | 464(2)  | 35(1)          |
| C(17A) | 812(3)   | 5085(2) | 758(2)  | 31(1)          |
| C(18A) | 1248(2)  | 4206(2) | 721(1)  | 25(1)          |
| C(19A) | 2284(2)  | 2562(2) | 706(1)  | 22(1)          |
| C(20A) | 2723(2)  | 1630(2) | 557(1)  | 23(1)          |
| C(21A) | 2981(2)  | 984(2)  | 993(1)  | 26(1)          |
| C(22A) | 3510(3)  | 186(2)  | 893(2)  | 28(1)          |
| C(23A) | 3798(2)  | 42(2)   | 349(2)  | 27(1)          |

|        |         |         |         |       |
|--------|---------|---------|---------|-------|
| C(24A) | 3517(2) | 650(2)  | -97(1)  | 26(1) |
| C(25A) | 2967(2) | 1450(2) | 0(1)    | 22(1) |
| N(1B)  | 8192(2) | 6459(2) | 2034(1) | 25(1) |
| N(2B)  | 6775(2) | 5210(2) | 1961(1) | 26(1) |
| N(3B)  | 5805(2) | 5343(2) | 986(1)  | 33(1) |
| N(4B)  | 4849(3) | 3799(2) | 805(2)  | 56(1) |
| C(1B)  | 8594(3) | 7474(2) | 2208(2) | 29(1) |
| C(2B)  | 9785(3) | 7454(3) | 2426(2) | 35(1) |
| C(3B)  | 9957(3) | 6385(3) | 2480(2) | 43(1) |
| C(4B)  | 8850(3) | 5888(2) | 2452(2) | 33(1) |
| C(5B)  | 7070(2) | 6263(2) | 2064(1) | 24(1) |
| C(6B)  | 5795(2) | 4922(2) | 2152(2) | 31(1) |
| C(7B)  | 5778(3) | 4893(2) | 2745(2) | 38(1) |
| C(8B)  | 4839(4) | 4605(3) | 2939(2) | 53(1) |
| C(9B)  | 3925(3) | 4343(3) | 2541(3) | 62(2) |
| C(10B) | 3943(3) | 4378(3) | 1951(3) | 52(1) |
| C(11B) | 4867(3) | 4671(2) | 1743(2) | 38(1) |
| C(12B) | 4857(3) | 4735(2) | 1092(2) | 40(1) |
| C(13B) | 5730(3) | 6333(2) | 1136(2) | 28(1) |
| C(14B) | 4982(3) | 6812(2) | 772(2)  | 34(1) |
| C(15B) | 4829(3) | 7757(2) | 901(2)  | 33(1) |
| C(16B) | 5448(3) | 8248(2) | 1388(2) | 30(1) |
| C(17B) | 6191(3) | 7777(2) | 1749(2) | 27(1) |
| C(18B) | 6350(2) | 6817(2) | 1630(1) | 25(1) |
| C(19B) | 6719(2) | 4963(2) | 1338(2) | 27(1) |
| C(20B) | 6687(3) | 3883(2) | 1219(2) | 28(1) |
| C(21B) | 7596(2) | 3420(2) | 1371(1) | 26(1) |
| C(22B) | 7616(3) | 2449(2) | 1233(2) | 29(1) |
| C(23B) | 6704(3) | 1933(2) | 926(2)  | 30(1) |
| C(24B) | 5782(3) | 2372(2) | 778(2)  | 33(1) |
| C(25B) | 5760(3) | 3351(2) | 929(2)  | 33(1) |
| N(1C)  | 5824(2) | 1195(2) | 2790(1) | 26(1) |
| N(2C)  | 7216(2) | 223(2)  | 2693(1) | 26(1) |
| N(3C)  | 8408(2) | 602(2)  | 3614(1) | 26(1) |
| N(4C)  | 9422(2) | -763(2) | 3663(1) | 34(1) |
| C(1C)  | 5358(3) | 2125(2) | 2729(2) | 34(1) |

|        |         |          |         |       |
|--------|---------|----------|---------|-------|
| C(2C)  | 4168(3) | 1857(3)  | 2696(2) | 38(1) |
| C(3C)  | 4017(3) | 760(2)   | 2606(2) | 32(1) |
| C(4C)  | 5042(3) | 517(2)   | 2417(2) | 30(1) |
| C(5C)  | 6874(3) | 1211(2)  | 2637(1) | 27(1) |
| C(6C)  | 7439(2) | 26(2)    | 3318(1) | 25(1) |
| C(7C)  | 7528(2) | -1027(2) | 3437(1) | 27(1) |
| C(8C)  | 6612(3) | -1656(2) | 3388(2) | 31(1) |
| C(9C)  | 6649(3) | -2607(3) | 3551(2) | 36(1) |
| C(10C) | 7624(3) | -2926(3) | 3777(2) | 38(1) |
| C(11C) | 8539(3) | -2322(3) | 3821(2) | 35(1) |
| C(12C) | 8504(3) | -1371(2) | 3644(1) | 30(1) |
| C(13C) | 8398(3) | 1599(2)  | 3477(1) | 29(1) |
| C(14C) | 9172(3) | 2253(3)  | 3814(2) | 34(1) |
| C(15C) | 9212(3) | 3220(3)  | 3704(2) | 40(1) |
| C(16C) | 8509(3) | 3552(3)  | 3260(2) | 42(1) |
| C(17C) | 7745(3) | 2909(2)  | 2915(2) | 35(1) |
| C(18C) | 7680(3) | 1923(2)  | 3026(2) | 29(1) |
| C(19C) | 9310(2) | 165(2)   | 3416(2) | 30(1) |
| C(20C) | 9130(3) | 88(2)    | 2751(2) | 30(1) |
| C(21C) | 9981(3) | 1(2)     | 2457(2) | 34(1) |
| C(22C) | 9840(3) | -43(2)   | 1856(2) | 36(1) |
| C(23C) | 8831(3) | -28(2)   | 1528(2) | 35(1) |
| C(24C) | 7979(3) | 51(2)    | 1810(2) | 30(1) |
| C(25C) | 8121(3) | 117(2)   | 2421(1) | 27(1) |
| N(1D)  | 7203(2) | 2495(2)  | 6968(1) | 32(1) |
| N(2D)  | 6866(2) | 1596(2)  | 6060(1) | 32(1) |
| N(3D)  | 8465(2) | 2038(3)  | 5669(1) | 38(1) |
| N(4D)  | 8483(2) | 797(3)   | 4964(1) | 40(1) |
| C(1D)  | 7149(3) | 3380(3)  | 7312(2) | 42(1) |
| C(2D)  | 7273(4) | 3039(3)  | 7945(2) | 50(1) |
| C(3D)  | 6924(4) | 1930(4)  | 7871(2) | 50(1) |
| C(4D)  | 6563(3) | 1774(3)  | 7231(2) | 41(1) |
| C(5D)  | 6848(3) | 2559(3)  | 6342(2) | 33(1) |
| C(6D)  | 7968(3) | 1398(3)  | 6061(2) | 34(1) |
| C(7D)  | 8029(3) | 352(3)   | 5890(2) | 35(1) |
| C(8D)  | 7803(3) | -370(3)  | 6265(2) | 37(1) |

|        |         |          |         |       |
|--------|---------|----------|---------|-------|
| C(9D)  | 7871(3) | -1332(3) | 6130(2) | 41(1) |
| C(10D) | 8177(3) | -1590(3) | 5602(2) | 44(1) |
| C(11D) | 8393(3) | -892(3)  | 5218(2) | 41(1) |
| C(12D) | 8302(3) | 80(3)    | 5352(2) | 38(1) |
| C(13D) | 8295(3) | 3021(3)  | 5757(2) | 41(1) |
| C(14D) | 8880(4) | 3720(4)  | 5486(2) | 55(1) |
| C(15D) | 8714(5) | 4682(4)  | 5530(2) | 66(2) |
| C(16D) | 7962(5) | 4974(4)  | 5844(2) | 65(1) |
| C(17D) | 7376(4) | 4291(3)  | 6115(2) | 51(1) |
| C(18D) | 7539(3) | 3314(3)  | 6079(2) | 40(1) |
| C(19D) | 8007(3) | 1669(3)  | 5064(2) | 36(1) |
| C(20D) | 6798(3) | 1509(3)  | 4994(2) | 33(1) |
| C(21D) | 6195(3) | 1361(3)  | 4436(2) | 39(1) |
| C(22D) | 5105(3) | 1180(3)  | 4362(2) | 47(1) |
| C(23D) | 4602(3) | 1168(3)  | 4841(2) | 45(1) |
| C(24D) | 5179(3) | 1340(3)  | 5395(2) | 38(1) |
| C(25D) | 6282(3) | 1497(3)  | 5477(2) | 33(1) |
| C(1S)  | 5934(4) | 4206(3)  | 4537(3) | 98(4) |
| Cl(1S) | 6886(2) | 3858(2)  | 4107(1) | 82(1) |
| Cl(2S) | 5797(2) | 5442(2)  | 4442(1) | 86(1) |
| Cl(3S) | 4718(2) | 3507(2)  | 4280(1) | 88(1) |
| C(1T)  | 5109(6) | 3377(8)  | 4750(3) | 98(4) |
| Cl(1T) | 4927(5) | 3942(5)  | 5410(2) | 82(1) |
| Cl(2T) | 6239(5) | 3921(5)  | 4504(3) | 86(1) |
| Cl(3T) | 3963(5) | 3432(5)  | 4213(3) | 88(1) |

---

—



**Table S2.** Bond lengths [Å] and angles [°] for compound 1.

|               |          |               |          |
|---------------|----------|---------------|----------|
| N(1A)-C(5A)   | 1.458(4) | C(10A)-H(10A) | 0.9500   |
| N(1A)-C(1A)   | 1.469(4) | C(11A)-C(12A) | 1.525(4) |
| N(1A)-C(4A)   | 1.477(4) | C(12A)-H(12A) | 1.0000   |
| N(2A)-C(6A)   | 1.432(4) | C(13A)-C(14A) | 1.397(5) |
| N(2A)-C(19A)  | 1.469(4) | C(13A)-C(18A) | 1.401(4) |
| N(2A)-C(5A)   | 1.480(4) | C(14A)-C(15A) | 1.387(4) |
| N(3A)-C(13A)  | 1.441(3) | C(14A)-H(14A) | 0.9500   |
| N(3A)-C(19A)  | 1.465(4) | C(15A)-C(16A) | 1.390(5) |
| N(3A)-C(12A)  | 1.488(4) | C(15A)-H(15A) | 0.9500   |
| N(4A)-C(25A)  | 1.383(4) | C(16A)-C(17A) | 1.384(5) |
| N(4A)-C(12A)  | 1.448(4) | C(16A)-H(16A) | 0.9500   |
| N(4A)-H(4A)   | 0.80(5)  | C(17A)-C(18A) | 1.399(4) |
| C(1A)-C(2A)   | 1.530(5) | C(17A)-H(17A) | 0.9500   |
| C(1A)-H(1AA)  | 0.9900   | C(19A)-C(20A) | 1.517(4) |
| C(1A)-H(1AB)  | 0.9900   | C(19A)-H(19A) | 1.0000   |
| C(2A)-C(3A)   | 1.496(6) | C(20A)-C(21A) | 1.392(4) |
| C(2A)-H(2AA)  | 0.9900   | C(20A)-C(25A) | 1.404(4) |
| C(2A)-H(2AB)  | 0.9900   | C(21A)-C(22A) | 1.388(4) |
| C(3A)-C(4A)   | 1.518(6) | C(21A)-H(21A) | 0.9500   |
| C(3A)-H(3AA)  | 0.9900   | C(22A)-C(23A) | 1.391(5) |
| C(3A)-H(3AB)  | 0.9900   | C(22A)-H(22A) | 0.9500   |
| C(4A)-H(4AA)  | 0.9900   | C(23A)-C(24A) | 1.378(5) |
| C(4A)-H(4AB)  | 0.9900   | C(23A)-H(23A) | 0.9500   |
| C(5A)-C(18A)  | 1.528(4) | C(24A)-C(25A) | 1.406(4) |
| C(5A)-H(5AA)  | 1.0000   | C(24A)-H(24A) | 0.9500   |
| C(6A)-C(11A)  | 1.385(5) | N(1B)-C(5B)   | 1.462(4) |
| C(6A)-C(7A)   | 1.399(4) | N(1B)-C(4B)   | 1.478(4) |
| C(7A)-C(8A)   | 1.380(5) | N(1B)-C(1B)   | 1.482(4) |
| C(7A)-H(7AA)  | 0.9500   | N(2B)-C(6B)   | 1.436(4) |
| C(8A)-C(9A)   | 1.388(6) | N(2B)-C(19B)  | 1.467(4) |
| C(8A)-H(8AA)  | 0.9500   | N(2B)-C(5B)   | 1.484(4) |
| C(9A)-C(10A)  | 1.381(5) | N(3B)-C(13B)  | 1.429(4) |
| C(9A)-H(9AA)  | 0.9500   | N(3B)-C(19B)  | 1.467(4) |
| C(10A)-C(11A) | 1.400(4) | N(3B)-C(12B)  | 1.483(5) |

|               |          |               |          |
|---------------|----------|---------------|----------|
| N(4B)-C(25B)  | 1.372(4) | C(17B)-C(18B) | 1.398(4) |
| N(4B)-C(12B)  | 1.445(4) | C(17B)-H(17B) | 0.9500   |
| N(4B)-H(4B)   | 0.88(5)  | C(19B)-C(20B) | 1.517(4) |
| C(1B)-C(2B)   | 1.538(4) | C(19B)-H(19B) | 1.0000   |
| C(1B)-H(1BA)  | 0.9900   | C(20B)-C(21B) | 1.387(4) |
| C(1B)-H(1BB)  | 0.9900   | C(20B)-C(25B) | 1.406(4) |
| C(2B)-C(3B)   | 1.531(5) | C(21B)-C(22B) | 1.385(4) |
| C(2B)-H(2BA)  | 0.9900   | C(21B)-H(21B) | 0.9500   |
| C(2B)-H(2BB)  | 0.9900   | C(22B)-C(23B) | 1.397(5) |
| C(3B)-C(4B)   | 1.520(5) | C(22B)-H(22B) | 0.9500   |
| C(3B)-H(3BA)  | 0.9900   | C(23B)-C(24B) | 1.382(5) |
| C(3B)-H(3BB)  | 0.9900   | C(23B)-H(23B) | 0.9500   |
| C(4B)-H(4BA)  | 0.9900   | C(24B)-C(25B) | 1.404(4) |
| C(4B)-H(4BB)  | 0.9900   | C(24B)-H(24B) | 0.9500   |
| C(5B)-C(18B)  | 1.527(4) | N(1C)-C(5C)   | 1.454(4) |
| C(5B)-H(5BA)  | 1.0000   | N(1C)-C(4C)   | 1.467(4) |
| C(6B)-C(7B)   | 1.383(6) | N(1C)-C(1C)   | 1.477(4) |
| C(6B)-C(11B)  | 1.408(5) | N(2C)-C(25C)  | 1.433(4) |
| C(7B)-C(8B)   | 1.390(5) | N(2C)-C(6C)   | 1.469(4) |
| C(7B)-H(7BA)  | 0.9500   | N(2C)-C(5C)   | 1.485(4) |
| C(8B)-C(9B)   | 1.386(8) | N(3C)-C(13C)  | 1.434(4) |
| C(8B)-H(8BA)  | 0.9500   | N(3C)-C(6C)   | 1.477(4) |
| C(9B)-C(10B)  | 1.376(8) | N(3C)-C(19C)  | 1.491(4) |
| C(9B)-H(9BA)  | 0.9500   | N(4C)-C(12C)  | 1.386(5) |
| C(10B)-C(11B) | 1.392(6) | N(4C)-C(19C)  | 1.438(5) |
| C(10B)-H(10B) | 0.9500   | N(4C)-H(4C)   | 0.86(5)  |
| C(11B)-C(12B) | 1.514(6) | C(1C)-C(2C)   | 1.536(5) |
| C(12B)-H(12B) | 1.0000   | C(1C)-H(1CA)  | 0.9900   |
| C(13B)-C(14B) | 1.401(5) | C(1C)-H(1CB)  | 0.9900   |
| C(13B)-C(18B) | 1.403(4) | C(2C)-C(3C)   | 1.527(5) |
| C(14B)-C(15B) | 1.380(5) | C(2C)-H(2CA)  | 0.9900   |
| C(14B)-H(14B) | 0.9500   | C(2C)-H(2CB)  | 0.9900   |
| C(15B)-C(16B) | 1.393(5) | C(3C)-C(4C)   | 1.523(5) |
| C(15B)-H(15B) | 0.9500   | C(3C)-H(3CA)  | 0.9900   |
| C(16B)-C(17B) | 1.388(5) | C(3C)-H(3CB)  | 0.9900   |
| C(16B)-H(16B) | 0.9500   | C(4C)-H(4CA)  | 0.9900   |

|               |          |               |          |
|---------------|----------|---------------|----------|
| C(4C)-H(4CB)  | 0.9900   | C(24C)-H(24C) | 0.9500   |
| C(5C)-C(18C)  | 1.528(4) | N(1D)-C(4D)   | 1.455(5) |
| C(5C)-H(5CA)  | 1.0000   | N(1D)-C(5D)   | 1.456(4) |
| C(6C)-C(7C)   | 1.511(4) | N(1D)-C(1D)   | 1.464(4) |
| C(6C)-H(6CA)  | 1.0000   | N(2D)-C(25D)  | 1.433(4) |
| C(7C)-C(8C)   | 1.393(5) | N(2D)-C(6D)   | 1.472(4) |
| C(7C)-C(12C)  | 1.401(5) | N(2D)-C(5D)   | 1.481(4) |
| C(8C)-C(9C)   | 1.390(5) | N(3D)-C(13D)  | 1.421(6) |
| C(8C)-H(8CA)  | 0.9500   | N(3D)-C(6D)   | 1.473(5) |
| C(9C)-C(10C)  | 1.396(5) | N(3D)-C(19D)  | 1.491(4) |
| C(9C)-H(9CA)  | 0.9500   | N(4D)-C(12D)  | 1.392(5) |
| C(10C)-C(11C) | 1.374(6) | N(4D)-C(19D)  | 1.439(5) |
| C(10C)-H(10C) | 0.9500   | N(4D)-H(4D)   | 0.96(6)  |
| C(11C)-C(12C) | 1.399(5) | C(1D)-C(2D)   | 1.544(6) |
| C(11C)-H(11A) | 0.9500   | C(1D)-H(1DA)  | 0.9900   |
| C(13C)-C(18C) | 1.391(5) | C(1D)-H(1DB)  | 0.9900   |
| C(13C)-C(14C) | 1.407(5) | C(2D)-C(3D)   | 1.566(7) |
| C(14C)-C(15C) | 1.376(5) | C(2D)-H(2DA)  | 0.9900   |
| C(14C)-H(14C) | 0.9500   | C(2D)-H(2DB)  | 0.9900   |
| C(15C)-C(16C) | 1.373(6) | C(3D)-C(4D)   | 1.485(5) |
| C(15C)-H(15C) | 0.9500   | C(3D)-H(3DA)  | 0.9900   |
| C(16C)-C(17C) | 1.399(5) | C(3D)-H(3DB)  | 0.9900   |
| C(16C)-H(16C) | 0.9500   | C(4D)-H(4DA)  | 0.9900   |
| C(17C)-C(18C) | 1.403(5) | C(4D)-H(4DB)  | 0.9900   |
| C(17C)-H(17C) | 0.9500   | C(5D)-C(18D)  | 1.524(5) |
| C(19C)-C(20C) | 1.524(5) | C(5D)-H(5DA)  | 1.0000   |
| C(19C)-H(19C) | 1.0000   | C(6D)-C(7D)   | 1.512(5) |
| C(20C)-C(21C) | 1.397(5) | C(6D)-H(6DA)  | 1.0000   |
| C(20C)-C(25C) | 1.400(5) | C(7D)-C(8D)   | 1.391(6) |
| C(21C)-C(22C) | 1.377(5) | C(7D)-C(12D)  | 1.406(5) |
| C(21C)-H(21C) | 0.9500   | C(8D)-C(9D)   | 1.382(6) |
| C(22C)-C(23C) | 1.397(6) | C(8D)-H(8DA)  | 0.9500   |
| C(22C)-H(22C) | 0.9500   | C(9D)-C(10D)  | 1.398(6) |
| C(23C)-C(24C) | 1.381(5) | C(9D)-H(9DA)  | 0.9500   |
| C(23C)-H(23C) | 0.9500   | C(10D)-C(11D) | 1.378(6) |
| C(24C)-C(25C) | 1.398(5) | C(10D)-H(10D) | 0.9500   |

|                   |          |                     |          |
|-------------------|----------|---------------------|----------|
| C(11D)-C(12D)     | 1.399(6) | C(6A)-N(2A)-C(19A)  | 111.1(2) |
| C(11D)-H(11B)     | 0.9500   | C(6A)-N(2A)-C(5A)   | 111.7(2) |
| C(13D)-C(14D)     | 1.404(6) | C(19A)-N(2A)-C(5A)  | 109.4(2) |
| C(13D)-C(18D)     | 1.404(6) | C(13A)-N(3A)-C(19A) | 111.4(2) |
| C(14D)-C(15D)     | 1.380(8) | C(13A)-N(3A)-C(12A) | 111.7(2) |
| C(14D)-H(14D)     | 0.9500   | C(19A)-N(3A)-C(12A) | 106.6(2) |
| C(15D)-C(16D)     | 1.389(8) | C(25A)-N(4A)-C(12A) | 115.0(3) |
| C(15D)-H(15D)     | 0.9500   | C(25A)-N(4A)-H(4A)  | 117(3)   |
| C(16D)-C(17D)     | 1.391(7) | C(12A)-N(4A)-H(4A)  | 117(3)   |
| C(16D)-H(16D)     | 0.9500   | N(1A)-C(1A)-C(2A)   | 105.5(3) |
| C(17D)-C(18D)     | 1.398(6) | N(1A)-C(1A)-H(1AA)  | 110.6    |
| C(17D)-H(17D)     | 0.9500   | C(2A)-C(1A)-H(1AA)  | 110.6    |
| C(19D)-C(20D)     | 1.536(5) | N(1A)-C(1A)-H(1AB)  | 110.6    |
| C(19D)-H(19D)     | 1.0000   | C(2A)-C(1A)-H(1AB)  | 110.6    |
| C(20D)-C(25D)     | 1.396(5) | H(1AA)-C(1A)-H(1AB) | 108.8    |
| C(20D)-C(21D)     | 1.396(5) | C(3A)-C(2A)-C(1A)   | 104.8(3) |
| C(21D)-C(22D)     | 1.386(6) | C(3A)-C(2A)-H(2AA)  | 110.8    |
| C(21D)-H(21D)     | 0.9500   | C(1A)-C(2A)-H(2AA)  | 110.8    |
| C(22D)-C(23D)     | 1.378(6) | C(3A)-C(2A)-H(2AB)  | 110.8    |
| C(22D)-H(22D)     | 0.9500   | C(1A)-C(2A)-H(2AB)  | 110.8    |
| C(23D)-C(24D)     | 1.378(5) | H(2AA)-C(2A)-H(2AB) | 108.9    |
| C(23D)-H(23D)     | 0.9500   | C(2A)-C(3A)-C(4A)   | 105.6(3) |
| C(24D)-C(25D)     | 1.401(5) | C(2A)-C(3A)-H(3AA)  | 110.6    |
| C(24D)-H(24D)     | 0.9500   | C(4A)-C(3A)-H(3AA)  | 110.6    |
| C(1S)-Cl(2S)      | 1.763(5) | C(2A)-C(3A)-H(3AB)  | 110.6    |
| C(1S)-Cl(3S)      | 1.774(5) | C(4A)-C(3A)-H(3AB)  | 110.6    |
| C(1S)-Cl(1S)      | 1.796(5) | H(3AA)-C(3A)-H(3AB) | 108.7    |
| C(1S)-H(1SA)      | 1.0000   | N(1A)-C(4A)-C(3A)   | 101.7(3) |
| C(1T)-Cl(1T)      | 1.765(5) | N(1A)-C(4A)-H(4AA)  | 111.4    |
| C(1T)-Cl(2T)      | 1.769(6) | C(3A)-C(4A)-H(4AA)  | 111.4    |
| C(1T)-Cl(3T)      | 1.776(5) | N(1A)-C(4A)-H(4AB)  | 111.4    |
| C(1T)-H(1TA)      | 1.0000   | C(3A)-C(4A)-H(4AB)  | 111.4    |
|                   |          | H(4AA)-C(4A)-H(4AB) | 109.3    |
| C(5A)-N(1A)-C(1A) | 113.5(3) | N(1A)-C(5A)-N(2A)   | 107.9(2) |
| C(5A)-N(1A)-C(4A) | 111.7(2) | N(1A)-C(5A)-C(18A)  | 113.3(2) |
| C(1A)-N(1A)-C(4A) | 104.4(3) | N(2A)-C(5A)-C(18A)  | 110.8(2) |

|                      |          |                      |          |
|----------------------|----------|----------------------|----------|
| N(1A)-C(5A)-H(5AA)   | 108.3    | C(17A)-C(16A)-C(15A) | 119.8(3) |
| N(2A)-C(5A)-H(5AA)   | 108.3    | C(17A)-C(16A)-H(16A) | 120.1    |
| C(18A)-C(5A)-H(5AA)  | 108.3    | C(15A)-C(16A)-H(16A) | 120.1    |
| C(11A)-C(6A)-C(7A)   | 120.7(3) | C(16A)-C(17A)-C(18A) | 121.8(3) |
| C(11A)-C(6A)-N(2A)   | 121.0(3) | C(16A)-C(17A)-H(17A) | 119.1    |
| C(7A)-C(6A)-N(2A)    | 118.3(3) | C(18A)-C(17A)-H(17A) | 119.1    |
| C(8A)-C(7A)-C(6A)    | 119.9(3) | C(17A)-C(18A)-C(13A) | 117.6(3) |
| C(8A)-C(7A)-H(7AA)   | 120.0    | C(17A)-C(18A)-C(5A)  | 121.7(3) |
| C(6A)-C(7A)-H(7AA)   | 120.0    | C(13A)-C(18A)-C(5A)  | 120.5(3) |
| C(7A)-C(8A)-C(9A)    | 119.9(3) | N(3A)-C(19A)-N(2A)   | 111.6(2) |
| C(7A)-C(8A)-H(8AA)   | 120.1    | N(3A)-C(19A)-C(20A)  | 108.5(2) |
| C(9A)-C(8A)-H(8AA)   | 120.1    | N(2A)-C(19A)-C(20A)  | 113.1(2) |
| C(10A)-C(9A)-C(8A)   | 120.0(3) | N(3A)-C(19A)-H(19A)  | 107.8    |
| C(10A)-C(9A)-H(9AA)  | 120.0    | N(2A)-C(19A)-H(19A)  | 107.8    |
| C(8A)-C(9A)-H(9AA)   | 120.0    | C(20A)-C(19A)-H(19A) | 107.8    |
| C(9A)-C(10A)-C(11A)  | 120.9(3) | C(21A)-C(20A)-C(25A) | 119.3(3) |
| C(9A)-C(10A)-H(10A)  | 119.5    | C(21A)-C(20A)-C(19A) | 119.5(3) |
| C(11A)-C(10A)-H(10A) | 119.5    | C(25A)-C(20A)-C(19A) | 120.9(3) |
| C(6A)-C(11A)-C(10A)  | 118.5(3) | C(22A)-C(21A)-C(20A) | 121.2(3) |
| C(6A)-C(11A)-C(12A)  | 121.5(3) | C(22A)-C(21A)-H(21A) | 119.4    |
| C(10A)-C(11A)-C(12A) | 120.0(3) | C(20A)-C(21A)-H(21A) | 119.4    |
| N(4A)-C(12A)-N(3A)   | 109.3(2) | C(21A)-C(22A)-C(23A) | 119.1(3) |
| N(4A)-C(12A)-C(11A)  | 108.9(2) | C(21A)-C(22A)-H(22A) | 120.5    |
| N(3A)-C(12A)-C(11A)  | 111.1(2) | C(23A)-C(22A)-H(22A) | 120.5    |
| N(4A)-C(12A)-H(12A)  | 109.2    | C(24A)-C(23A)-C(22A) | 120.8(3) |
| N(3A)-C(12A)-H(12A)  | 109.2    | C(24A)-C(23A)-H(23A) | 119.6    |
| C(11A)-C(12A)-H(12A) | 109.2    | C(22A)-C(23A)-H(23A) | 119.6    |
| C(14A)-C(13A)-C(18A) | 120.9(3) | C(23A)-C(24A)-C(25A) | 120.2(3) |
| C(14A)-C(13A)-N(3A)  | 116.9(3) | C(23A)-C(24A)-H(24A) | 119.9    |
| C(18A)-C(13A)-N(3A)  | 122.2(3) | C(25A)-C(24A)-H(24A) | 119.9    |
| C(15A)-C(14A)-C(13A) | 120.1(3) | N(4A)-C(25A)-C(20A)  | 120.3(3) |
| C(15A)-C(14A)-H(14A) | 120.0    | N(4A)-C(25A)-C(24A)  | 120.4(3) |
| C(13A)-C(14A)-H(14A) | 120.0    | C(20A)-C(25A)-C(24A) | 119.2(3) |
| C(14A)-C(15A)-C(16A) | 119.8(3) | C(5B)-N(1B)-C(4B)    | 111.5(3) |
| C(14A)-C(15A)-H(15A) | 120.1    | C(5B)-N(1B)-C(1B)    | 112.2(2) |
| C(16A)-C(15A)-H(15A) | 120.1    | C(4B)-N(1B)-C(1B)    | 104.1(2) |

|                     |          |                      |          |
|---------------------|----------|----------------------|----------|
| C(6B)-N(2B)-C(19B)  | 111.3(3) | N(1B)-C(5B)-H(5BA)   | 108.2    |
| C(6B)-N(2B)-C(5B)   | 111.4(2) | N(2B)-C(5B)-H(5BA)   | 108.2    |
| C(19B)-N(2B)-C(5B)  | 108.8(2) | C(18B)-C(5B)-H(5BA)  | 108.2    |
| C(13B)-N(3B)-C(19B) | 112.2(2) | C(7B)-C(6B)-C(11B)   | 120.6(3) |
| C(13B)-N(3B)-C(12B) | 110.6(3) | C(7B)-C(6B)-N(2B)    | 118.8(3) |
| C(19B)-N(3B)-C(12B) | 106.6(3) | C(11B)-C(6B)-N(2B)   | 120.7(3) |
| C(25B)-N(4B)-C(12B) | 116.2(3) | C(6B)-C(7B)-C(8B)    | 119.7(4) |
| C(25B)-N(4B)-H(4B)  | 122(3)   | C(6B)-C(7B)-H(7BA)   | 120.2    |
| C(12B)-N(4B)-H(4B)  | 122(3)   | C(8B)-C(7B)-H(7BA)   | 120.2    |
| N(1B)-C(1B)-C(2B)   | 105.3(3) | C(9B)-C(8B)-C(7B)    | 120.3(5) |
| N(1B)-C(1B)-H(1BA)  | 110.7    | C(9B)-C(8B)-H(8BA)   | 119.9    |
| C(2B)-C(1B)-H(1BA)  | 110.7    | C(7B)-C(8B)-H(8BA)   | 119.9    |
| N(1B)-C(1B)-H(1BB)  | 110.7    | C(10B)-C(9B)-C(8B)   | 119.9(4) |
| C(2B)-C(1B)-H(1BB)  | 110.7    | C(10B)-C(9B)-H(9BA)  | 120.1    |
| H(1BA)-C(1B)-H(1BB) | 108.8    | C(8B)-C(9B)-H(9BA)   | 120.1    |
| C(3B)-C(2B)-C(1B)   | 105.3(3) | C(9B)-C(10B)-C(11B)  | 121.2(4) |
| C(3B)-C(2B)-H(2BA)  | 110.7    | C(9B)-C(10B)-H(10B)  | 119.4    |
| C(1B)-C(2B)-H(2BA)  | 110.7    | C(11B)-C(10B)-H(10B) | 119.4    |
| C(3B)-C(2B)-H(2BB)  | 110.7    | C(10B)-C(11B)-C(6B)  | 118.3(4) |
| C(1B)-C(2B)-H(2BB)  | 110.7    | C(10B)-C(11B)-C(12B) | 120.1(4) |
| H(2BA)-C(2B)-H(2BB) | 108.8    | C(6B)-C(11B)-C(12B)  | 121.5(3) |
| C(4B)-C(3B)-C(2B)   | 103.9(3) | N(4B)-C(12B)-N(3B)   | 108.1(3) |
| C(4B)-C(3B)-H(3BA)  | 111.0    | N(4B)-C(12B)-C(11B)  | 112.4(3) |
| C(2B)-C(3B)-H(3BA)  | 111.0    | N(3B)-C(12B)-C(11B)  | 109.9(3) |
| C(4B)-C(3B)-H(3BB)  | 111.0    | N(4B)-C(12B)-H(12B)  | 108.8    |
| C(2B)-C(3B)-H(3BB)  | 111.0    | N(3B)-C(12B)-H(12B)  | 108.8    |
| H(3BA)-C(3B)-H(3BB) | 109.0    | C(11B)-C(12B)-H(12B) | 108.8    |
| N(1B)-C(4B)-C(3B)   | 103.3(3) | C(14B)-C(13B)-C(18B) | 120.2(3) |
| N(1B)-C(4B)-H(4BA)  | 111.1    | C(14B)-C(13B)-N(3B)  | 117.2(3) |
| C(3B)-C(4B)-H(4BA)  | 111.1    | C(18B)-C(13B)-N(3B)  | 122.6(3) |
| N(1B)-C(4B)-H(4BB)  | 111.1    | C(15B)-C(14B)-C(13B) | 120.6(3) |
| C(3B)-C(4B)-H(4BB)  | 111.1    | C(15B)-C(14B)-H(14B) | 119.7    |
| H(4BA)-C(4B)-H(4BB) | 109.1    | C(13B)-C(14B)-H(14B) | 119.7    |
| N(1B)-C(5B)-N(2B)   | 108.3(2) | C(14B)-C(15B)-C(16B) | 119.6(3) |
| N(1B)-C(5B)-C(18B)  | 113.8(3) | C(14B)-C(15B)-H(15B) | 120.2    |
| N(2B)-C(5B)-C(18B)  | 109.9(2) | C(16B)-C(15B)-H(15B) | 120.2    |

|                      |          |                     |          |
|----------------------|----------|---------------------|----------|
| C(17B)-C(16B)-C(15B) | 119.9(3) | C(25C)-N(2C)-C(6C)  | 111.2(2) |
| C(17B)-C(16B)-H(16B) | 120.0    | C(25C)-N(2C)-C(5C)  | 111.6(2) |
| C(15B)-C(16B)-H(16B) | 120.0    | C(6C)-N(2C)-C(5C)   | 108.2(2) |
| C(16B)-C(17B)-C(18B) | 121.4(3) | C(13C)-N(3C)-C(6C)  | 111.4(2) |
| C(16B)-C(17B)-H(17B) | 119.3    | C(13C)-N(3C)-C(19C) | 111.6(3) |
| C(18B)-C(17B)-H(17B) | 119.3    | C(6C)-N(3C)-C(19C)  | 106.3(2) |
| C(17B)-C(18B)-C(13B) | 118.2(3) | C(12C)-N(4C)-C(19C) | 116.8(3) |
| C(17B)-C(18B)-C(5B)  | 121.3(3) | C(12C)-N(4C)-H(4C)  | 117(3)   |
| C(13B)-C(18B)-C(5B)  | 120.0(3) | C(19C)-N(4C)-H(4C)  | 120(3)   |
| N(2B)-C(19B)-N(3B)   | 111.0(3) | N(1C)-C(1C)-C(2C)   | 104.5(3) |
| N(2B)-C(19B)-C(20B)  | 112.1(3) | N(1C)-C(1C)-H(1CA)  | 110.9    |
| N(3B)-C(19B)-C(20B)  | 110.1(2) | C(2C)-C(1C)-H(1CA)  | 110.9    |
| N(2B)-C(19B)-H(19B)  | 107.8    | N(1C)-C(1C)-H(1CB)  | 110.9    |
| N(3B)-C(19B)-H(19B)  | 107.8    | C(2C)-C(1C)-H(1CB)  | 110.9    |
| C(20B)-C(19B)-H(19B) | 107.8    | H(1CA)-C(1C)-H(1CB) | 108.9    |
| C(21B)-C(20B)-C(25B) | 119.4(3) | C(3C)-C(2C)-C(1C)   | 105.0(3) |
| C(21B)-C(20B)-C(19B) | 119.7(3) | C(3C)-C(2C)-H(2CA)  | 110.8    |
| C(25B)-C(20B)-C(19B) | 120.8(3) | C(1C)-C(2C)-H(2CA)  | 110.8    |
| C(22B)-C(21B)-C(20B) | 121.4(3) | C(3C)-C(2C)-H(2CB)  | 110.8    |
| C(22B)-C(21B)-H(21B) | 119.3    | C(1C)-C(2C)-H(2CB)  | 110.8    |
| C(20B)-C(21B)-H(21B) | 119.3    | H(2CA)-C(2C)-H(2CB) | 108.8    |
| C(21B)-C(22B)-C(23B) | 118.9(3) | C(4C)-C(3C)-C(2C)   | 103.4(3) |
| C(21B)-C(22B)-H(22B) | 120.5    | C(4C)-C(3C)-H(3CA)  | 111.1    |
| C(23B)-C(22B)-H(22B) | 120.5    | C(2C)-C(3C)-H(3CA)  | 111.1    |
| C(24B)-C(23B)-C(22B) | 120.8(3) | C(4C)-C(3C)-H(3CB)  | 111.1    |
| C(24B)-C(23B)-H(23B) | 119.6    | C(2C)-C(3C)-H(3CB)  | 111.1    |
| C(22B)-C(23B)-H(23B) | 119.6    | H(3CA)-C(3C)-H(3CB) | 109.0    |
| C(23B)-C(24B)-C(25B) | 120.0(3) | N(1C)-C(4C)-C(3C)   | 101.7(3) |
| C(23B)-C(24B)-H(24B) | 120.0    | N(1C)-C(4C)-H(4CA)  | 111.4    |
| C(25B)-C(24B)-H(24B) | 120.0    | C(3C)-C(4C)-H(4CA)  | 111.4    |
| N(4B)-C(25B)-C(24B)  | 121.4(3) | N(1C)-C(4C)-H(4CB)  | 111.4    |
| N(4B)-C(25B)-C(20B)  | 119.2(3) | C(3C)-C(4C)-H(4CB)  | 111.4    |
| C(24B)-C(25B)-C(20B) | 119.4(3) | H(4CA)-C(4C)-H(4CB) | 109.3    |
| C(5C)-N(1C)-C(4C)    | 113.1(2) | N(1C)-C(5C)-N(2C)   | 108.0(2) |
| C(5C)-N(1C)-C(1C)    | 114.2(3) | N(1C)-C(5C)-C(18C)  | 112.6(2) |
| C(4C)-N(1C)-C(1C)    | 103.7(2) | N(2C)-C(5C)-C(18C)  | 109.5(3) |

|                      |          |                      |          |
|----------------------|----------|----------------------|----------|
| N(1C)-C(5C)-H(5CA)   | 108.9    | C(15C)-C(16C)-C(17C) | 120.3(3) |
| N(2C)-C(5C)-H(5CA)   | 108.9    | C(15C)-C(16C)-H(16C) | 119.9    |
| C(18C)-C(5C)-H(5CA)  | 108.9    | C(17C)-C(16C)-H(16C) | 119.9    |
| N(2C)-C(6C)-N(3C)    | 111.2(3) | C(16C)-C(17C)-C(18C) | 120.1(4) |
| N(2C)-C(6C)-C(7C)    | 113.8(2) | C(16C)-C(17C)-H(17C) | 119.9    |
| N(3C)-C(6C)-C(7C)    | 109.2(2) | C(18C)-C(17C)-H(17C) | 119.9    |
| N(2C)-C(6C)-H(6CA)   | 107.4    | C(13C)-C(18C)-C(17C) | 118.9(3) |
| N(3C)-C(6C)-H(6CA)   | 107.4    | C(13C)-C(18C)-C(5C)  | 120.6(3) |
| C(7C)-C(6C)-H(6CA)   | 107.4    | C(17C)-C(18C)-C(5C)  | 120.4(3) |
| C(8C)-C(7C)-C(12C)   | 119.0(3) | N(4C)-C(19C)-N(3C)   | 109.8(3) |
| C(8C)-C(7C)-C(6C)    | 119.3(3) | N(4C)-C(19C)-C(20C)  | 111.4(3) |
| C(12C)-C(7C)-C(6C)   | 121.5(3) | N(3C)-C(19C)-C(20C)  | 109.5(3) |
| C(9C)-C(8C)-C(7C)    | 121.2(3) | N(4C)-C(19C)-H(19C)  | 108.7    |
| C(9C)-C(8C)-H(8CA)   | 119.4    | N(3C)-C(19C)-H(19C)  | 108.7    |
| C(7C)-C(8C)-H(8CA)   | 119.4    | C(20C)-C(19C)-H(19C) | 108.7    |
| C(8C)-C(9C)-C(10C)   | 118.9(3) | C(21C)-C(20C)-C(25C) | 118.7(3) |
| C(8C)-C(9C)-H(9CA)   | 120.5    | C(21C)-C(20C)-C(19C) | 120.1(3) |
| C(10C)-C(9C)-H(9CA)  | 120.5    | C(25C)-C(20C)-C(19C) | 121.2(3) |
| C(11C)-C(10C)-C(9C)  | 120.7(3) | C(22C)-C(21C)-C(20C) | 121.0(3) |
| C(11C)-C(10C)-H(10C) | 119.6    | C(22C)-C(21C)-H(21C) | 119.5    |
| C(9C)-C(10C)-H(10C)  | 119.6    | C(20C)-C(21C)-H(21C) | 119.5    |
| C(10C)-C(11C)-C(12C) | 120.3(3) | C(21C)-C(22C)-C(23C) | 120.2(3) |
| C(10C)-C(11C)-H(11A) | 119.8    | C(21C)-C(22C)-H(22C) | 119.9    |
| C(12C)-C(11C)-H(11A) | 119.8    | C(23C)-C(22C)-H(22C) | 119.9    |
| N(4C)-C(12C)-C(11C)  | 121.1(3) | C(24C)-C(23C)-C(22C) | 119.6(3) |
| N(4C)-C(12C)-C(7C)   | 119.2(3) | C(24C)-C(23C)-H(23C) | 120.2    |
| C(11C)-C(12C)-C(7C)  | 119.7(3) | C(22C)-C(23C)-H(23C) | 120.2    |
| C(18C)-C(13C)-C(14C) | 120.3(3) | C(23C)-C(24C)-C(25C) | 120.5(3) |
| C(18C)-C(13C)-N(3C)  | 122.8(3) | C(23C)-C(24C)-H(24C) | 119.7    |
| C(14C)-C(13C)-N(3C)  | 116.9(3) | C(25C)-C(24C)-H(24C) | 119.7    |
| C(15C)-C(14C)-C(13C) | 119.9(4) | C(24C)-C(25C)-C(20C) | 120.0(3) |
| C(15C)-C(14C)-H(14C) | 120.1    | C(24C)-C(25C)-N(2C)  | 118.4(3) |
| C(13C)-C(14C)-H(14C) | 120.1    | C(20C)-C(25C)-N(2C)  | 121.6(3) |
| C(16C)-C(15C)-C(14C) | 120.6(3) | C(4D)-N(1D)-C(5D)    | 113.0(3) |
| C(16C)-C(15C)-H(15C) | 119.7    | C(4D)-N(1D)-C(1D)    | 103.2(3) |
| C(14C)-C(15C)-H(15C) | 119.7    | C(5D)-N(1D)-C(1D)    | 114.2(3) |



|                     |          |                      |          |
|---------------------|----------|----------------------|----------|
| C(25D)-N(2D)-C(6D)  | 110.1(3) | N(1D)-C(5D)-H(5DA)   | 108.9    |
| C(25D)-N(2D)-C(5D)  | 113.2(3) | N(2D)-C(5D)-H(5DA)   | 108.9    |
| C(6D)-N(2D)-C(5D)   | 109.4(3) | C(18D)-C(5D)-H(5DA)  | 108.9    |
| C(13D)-N(3D)-C(6D)  | 112.7(3) | N(2D)-C(6D)-N(3D)    | 110.9(3) |
| C(13D)-N(3D)-C(19D) | 111.5(3) | N(2D)-C(6D)-C(7D)    | 110.9(3) |
| C(6D)-N(3D)-C(19D)  | 105.9(3) | N(3D)-C(6D)-C(7D)    | 110.5(3) |
| C(12D)-N(4D)-C(19D) | 114.0(3) | N(2D)-C(6D)-H(6DA)   | 108.2    |
| C(12D)-N(4D)-H(4D)  | 111(3)   | N(3D)-C(6D)-H(6DA)   | 108.2    |
| C(19D)-N(4D)-H(4D)  | 125(3)   | C(7D)-C(6D)-H(6DA)   | 108.2    |
| N(1D)-C(1D)-C(2D)   | 103.2(3) | C(8D)-C(7D)-C(12D)   | 118.3(4) |
| N(1D)-C(1D)-H(1DA)  | 111.1    | C(8D)-C(7D)-C(6D)    | 120.2(3) |
| C(2D)-C(1D)-H(1DA)  | 111.1    | C(12D)-C(7D)-C(6D)   | 121.6(3) |
| N(1D)-C(1D)-H(1DB)  | 111.1    | C(9D)-C(8D)-C(7D)    | 122.0(4) |
| C(2D)-C(1D)-H(1DB)  | 111.1    | C(9D)-C(8D)-H(8DA)   | 119.0    |
| H(1DA)-C(1D)-H(1DB) | 109.1    | C(7D)-C(8D)-H(8DA)   | 119.0    |
| C(1D)-C(2D)-C(3D)   | 104.0(3) | C(8D)-C(9D)-C(10D)   | 119.2(4) |
| C(1D)-C(2D)-H(2DA)  | 111.0    | C(8D)-C(9D)-H(9DA)   | 120.4    |
| C(3D)-C(2D)-H(2DA)  | 111.0    | C(10D)-C(9D)-H(9DA)  | 120.4    |
| C(1D)-C(2D)-H(2DB)  | 111.0    | C(11D)-C(10D)-C(9D)  | 120.2(4) |
| C(3D)-C(2D)-H(2DB)  | 110.9    | C(11D)-C(10D)-H(10D) | 119.9    |
| H(2DA)-C(2D)-H(2DB) | 109.0    | C(9D)-C(10D)-H(10D)  | 119.9    |
| C(4D)-C(3D)-C(2D)   | 103.4(3) | C(10D)-C(11D)-C(12D) | 120.4(4) |
| C(4D)-C(3D)-H(3DA)  | 111.1    | C(10D)-C(11D)-H(11B) | 119.8    |
| C(2D)-C(3D)-H(3DA)  | 111.1    | C(12D)-C(11D)-H(11B) | 119.8    |
| C(4D)-C(3D)-H(3DB)  | 111.1    | N(4D)-C(12D)-C(11D)  | 121.7(3) |
| C(2D)-C(3D)-H(3DB)  | 111.1    | N(4D)-C(12D)-C(7D)   | 118.4(4) |
| H(3DA)-C(3D)-H(3DB) | 109.1    | C(11D)-C(12D)-C(7D)  | 119.9(4) |
| N(1D)-C(4D)-C(3D)   | 105.0(3) | C(14D)-C(13D)-C(18D) | 119.2(4) |
| N(1D)-C(4D)-H(4DA)  | 110.8    | C(14D)-C(13D)-N(3D)  | 117.9(4) |
| C(3D)-C(4D)-H(4DA)  | 110.8    | C(18D)-C(13D)-N(3D)  | 122.8(3) |
| N(1D)-C(4D)-H(4DB)  | 110.8    | C(15D)-C(14D)-C(13D) | 120.8(5) |
| C(3D)-C(4D)-H(4DB)  | 110.8    | C(15D)-C(14D)-H(14D) | 119.6    |
| H(4DA)-C(4D)-H(4DB) | 108.8    | C(13D)-C(14D)-H(14D) | 119.6    |
| N(1D)-C(5D)-N(2D)   | 108.1(3) | C(14D)-C(15D)-C(16D) | 120.3(4) |
| N(1D)-C(5D)-C(18D)  | 111.7(3) | C(14D)-C(15D)-H(15D) | 119.9    |
| N(2D)-C(5D)-C(18D)  | 110.4(3) | C(16D)-C(15D)-H(15D) | 119.9    |

|                      |          |                      |          |
|----------------------|----------|----------------------|----------|
| C(15D)-C(16D)-C(17D) | 119.6(5) | C(22D)-C(23D)-C(24D) | 120.1(4) |
| C(15D)-C(16D)-H(16D) | 120.2    | C(22D)-C(23D)-H(23D) | 119.9    |
| C(17D)-C(16D)-H(16D) | 120.2    | C(24D)-C(23D)-H(23D) | 119.9    |
| C(16D)-C(17D)-C(18D) | 120.9(5) | C(23D)-C(24D)-C(25D) | 120.3(3) |
| C(16D)-C(17D)-H(17D) | 119.6    | C(23D)-C(24D)-H(24D) | 119.9    |
| C(18D)-C(17D)-H(17D) | 119.6    | C(25D)-C(24D)-H(24D) | 119.9    |
| C(17D)-C(18D)-C(13D) | 119.3(4) | C(20D)-C(25D)-C(24D) | 119.9(3) |
| C(17D)-C(18D)-C(5D)  | 120.8(4) | C(20D)-C(25D)-N(2D)  | 121.1(3) |
| C(13D)-C(18D)-C(5D)  | 119.8(4) | C(24D)-C(25D)-N(2D)  | 118.9(3) |
| N(4D)-C(19D)-N(3D)   | 106.8(3) | Cl(2S)-C(1S)-Cl(3S)  | 110.4(3) |
| N(4D)-C(19D)-C(20D)  | 112.8(3) | Cl(2S)-C(1S)-Cl(1S)  | 107.8(3) |
| N(3D)-C(19D)-C(20D)  | 110.1(3) | Cl(3S)-C(1S)-Cl(1S)  | 108.2(3) |
| N(4D)-C(19D)-H(19D)  | 109.0    | Cl(2S)-C(1S)-H(1SA)  | 110.1    |
| N(3D)-C(19D)-H(19D)  | 109.0    | Cl(3S)-C(1S)-H(1SA)  | 110.1    |
| C(20D)-C(19D)-H(19D) | 109.0    | Cl(1S)-C(1S)-H(1SA)  | 110.1    |
| C(25D)-C(20D)-C(21D) | 118.9(3) | Cl(1T)-C(1T)-Cl(2T)  | 111.1(4) |
| C(25D)-C(20D)-C(19D) | 121.6(3) | Cl(1T)-C(1T)-Cl(3T)  | 109.5(4) |
| C(21D)-C(20D)-C(19D) | 119.6(3) | Cl(2T)-C(1T)-Cl(3T)  | 110.6(4) |
| C(22D)-C(21D)-C(20D) | 120.6(4) | Cl(1T)-C(1T)-H(1TA)  | 108.5    |
| C(22D)-C(21D)-H(21D) | 119.7    | Cl(2T)-C(1T)-H(1TA)  | 108.5    |
| C(20D)-C(21D)-H(21D) | 119.7    | Cl(3T)-C(1T)-H(1TA)  | 108.5    |
| C(23D)-C(22D)-C(21D) | 120.2(3) |                      |          |
| C(23D)-C(22D)-H(22D) | 119.9    |                      |          |
| C(21D)-C(22D)-H(22D) | 119.9    |                      |          |

---

Symmetry transformations used to generate equivalent atoms:

**Table S3.** Anisotropic displacement parameters ( $\text{\AA}^2 \times 10^3$ ) for **1**. The anisotropic displacement factor exponent takes the form:  $-2p^2[ h^2 a^{*2} U^{11} + \dots + 2 h k a^* b^* U^{12} ]$

|        | U11   | U22   | U33   | U23    | U13   | U12   |
|--------|-------|-------|-------|--------|-------|-------|
| N(1A)  | 23(1) | 25(1) | 27(1) | -6(1)  | 3(1)  | 1(1)  |
| N(2A)  | 21(1) | 20(1) | 29(1) | -6(1)  | 2(1)  | 1(1)  |
| N(3A)  | 21(1) | 14(1) | 32(1) | -4(1)  | 2(1)  | 1(1)  |
| N(4A)  | 26(1) | 20(1) | 32(1) | -1(1)  | 7(1)  | 5(1)  |
| C(1A)  | 27(2) | 34(2) | 36(2) | -11(1) | 7(1)  | 2(1)  |
| C(2A)  | 34(2) | 55(2) | 35(2) | -8(2)  | 10(1) | 5(2)  |
| C(3A)  | 58(3) | 49(2) | 41(2) | 4(2)   | 14(2) | 6(2)  |
| C(4A)  | 33(2) | 37(2) | 37(2) | 2(1)   | 6(1)  | -2(1) |
| C(5A)  | 20(1) | 24(1) | 28(2) | -8(1)  | 1(1)  | 3(1)  |
| C(6A)  | 23(1) | 19(1) | 31(2) | -7(1)  | 1(1)  | 2(1)  |
| C(7A)  | 24(2) | 28(2) | 43(2) | -9(1)  | 5(1)  | -2(1) |
| C(8A)  | 23(2) | 34(2) | 55(2) | -20(2) | 1(2)  | -4(1) |
| C(9A)  | 28(2) | 38(2) | 45(2) | -21(2) | -8(1) | 6(1)  |
| C(10A) | 29(2) | 32(2) | 33(2) | -10(1) | -2(1) | 11(1) |
| C(11A) | 21(1) | 19(1) | 32(2) | -5(1)  | -1(1) | 7(1)  |
| C(12A) | 26(1) | 17(1) | 29(2) | -2(1)  | 4(1)  | 5(1)  |
| C(13A) | 20(1) | 16(1) | 31(2) | -6(1)  | -2(1) | 3(1)  |
| C(14A) | 26(1) | 22(1) | 35(2) | -2(1)  | 0(1)  | 2(1)  |
| C(15A) | 39(2) | 19(2) | 39(2) | -1(1)  | -1(1) | 3(1)  |
| C(16A) | 40(2) | 20(2) | 43(2) | -6(1)  | -2(2) | 9(1)  |
| C(17A) | 29(2) | 28(2) | 36(2) | -7(1)  | 0(1)  | 10(1) |
| C(18A) | 23(1) | 21(1) | 30(2) | -6(1)  | -2(1) | 3(1)  |
| C(19A) | 18(1) | 18(1) | 29(1) | -3(1)  | 1(1)  | 2(1)  |
| C(20A) | 18(1) | 16(1) | 31(2) | -4(1)  | -1(1) | 1(1)  |
| C(21A) | 24(1) | 21(1) | 30(2) | -3(1)  | -1(1) | 2(1)  |
| C(22A) | 27(2) | 16(1) | 38(2) | 0(1)   | -3(1) | 2(1)  |
| C(23A) | 21(1) | 16(1) | 43(2) | -3(1)  | 1(1)  | 1(1)  |
| C(24A) | 23(1) | 17(1) | 36(2) | -5(1)  | 4(1)  | 1(1)  |
| C(25A) | 18(1) | 15(1) | 32(2) | -3(1)  | 1(1)  | 0(1)  |
| N(1B)  | 21(1) | 17(1) | 36(1) | -4(1)  | 2(1)  | -1(1) |
| N(2B)  | 22(1) | 14(1) | 39(1) | -4(1)  | 2(1)  | -1(1) |

|        |       |       |        |        |        |       |
|--------|-------|-------|--------|--------|--------|-------|
| N(3B)  | 29(1) | 21(1) | 45(2)  | -7(1)  | -10(1) | 6(1)  |
| N(4B)  | 32(2) | 27(2) | 95(3)  | -27(2) | -28(2) | 9(1)  |
| C(1B)  | 27(2) | 21(1) | 37(2)  | -5(1)  | 4(1)   | -2(1) |
| C(2B)  | 27(2) | 29(2) | 45(2)  | -3(1)  | 0(1)   | -2(1) |
| C(3B)  | 25(2) | 29(2) | 71(3)  | -8(2)  | -2(2)  | 1(1)  |
| C(4B)  | 25(2) | 23(2) | 47(2)  | -4(1)  | -4(1)  | 3(1)  |
| C(5B)  | 22(1) | 14(1) | 34(2)  | -3(1)  | 1(1)   | -2(1) |
| C(6B)  | 22(1) | 15(1) | 56(2)  | 0(1)   | 7(1)   | 1(1)  |
| C(7B)  | 35(2) | 23(2) | 61(2)  | 6(2)   | 16(2)  | 4(1)  |
| C(8B)  | 52(2) | 26(2) | 91(3)  | 7(2)   | 41(2)  | 6(2)  |
| C(9B)  | 35(2) | 24(2) | 134(5) | -3(2)  | 41(3)  | -3(2) |
| C(10B) | 23(2) | 22(2) | 111(4) | -13(2) | 15(2)  | -2(1) |
| C(11B) | 22(2) | 14(1) | 74(3)  | -8(1)  | 2(2)   | -1(1) |
| C(12B) | 23(2) | 18(2) | 72(3)  | -13(2) | -11(2) | 2(1)  |
| C(13B) | 26(2) | 18(1) | 38(2)  | -2(1)  | -1(1)  | 3(1)  |
| C(14B) | 31(2) | 28(2) | 39(2)  | -1(1)  | -4(1)  | 6(1)  |
| C(15B) | 29(2) | 23(2) | 46(2)  | 7(1)   | 2(1)   | 6(1)  |
| C(16B) | 30(2) | 20(1) | 43(2)  | 2(1)   | 10(1)  | 6(1)  |
| C(17B) | 27(2) | 21(1) | 35(2)  | -1(1)  | 7(1)   | 2(1)  |
| C(18B) | 22(1) | 18(1) | 36(2)  | -1(1)  | 3(1)   | -1(1) |
| C(19B) | 24(1) | 19(1) | 36(2)  | -4(1)  | -4(1)  | 2(1)  |
| C(20B) | 27(2) | 18(1) | 37(2)  | -5(1)  | -1(1)  | 1(1)  |
| C(21B) | 24(1) | 20(1) | 34(2)  | -2(1)  | 2(1)   | 1(1)  |
| C(22B) | 29(2) | 23(2) | 35(2)  | -2(1)  | 5(1)   | 5(1)  |
| C(23B) | 36(2) | 20(1) | 34(2)  | -6(1)  | 4(1)   | 4(1)  |
| C(24B) | 33(2) | 22(2) | 39(2)  | -7(1)  | -3(1)  | 0(1)  |
| C(25B) | 27(2) | 21(2) | 47(2)  | -7(1)  | -7(1)  | 2(1)  |
| N(1C)  | 25(1) | 22(1) | 30(1)  | -5(1)  | 3(1)   | 1(1)  |
| N(2C)  | 26(1) | 24(1) | 25(1)  | -4(1)  | 4(1)   | 1(1)  |
| N(3C)  | 22(1) | 25(1) | 31(1)  | -6(1)  | 3(1)   | -3(1) |
| N(4C)  | 26(1) | 35(2) | 37(2)  | -3(1)  | -2(1)  | 2(1)  |
| C(1C)  | 34(2) | 24(2) | 44(2)  | -2(1)  | 6(1)   | 5(1)  |
| C(2C)  | 32(2) | 34(2) | 49(2)  | -2(2)  | 6(2)   | 7(1)  |
| C(3C)  | 27(2) | 31(2) | 37(2)  | -1(1)  | 1(1)   | 2(1)  |
| C(4C)  | 29(2) | 27(2) | 31(2)  | -5(1)  | 1(1)   | 1(1)  |
| C(5C)  | 29(2) | 23(1) | 29(2)  | -3(1)  | 6(1)   | 1(1)  |

|        |       |       |       |        |       |        |
|--------|-------|-------|-------|--------|-------|--------|
| C(6C)  | 22(1) | 28(2) | 26(1) | -5(1)  | 2(1)  | 0(1)   |
| C(7C)  | 26(2) | 26(2) | 27(2) | -4(1)  | 3(1)  | 1(1)   |
| C(8C)  | 27(2) | 32(2) | 32(2) | -2(1)  | 5(1)  | 2(1)   |
| C(9C)  | 37(2) | 29(2) | 42(2) | 0(1)   | 9(2)  | -2(1)  |
| C(10C) | 45(2) | 31(2) | 40(2) | 4(1)   | 8(2)  | 6(2)   |
| C(11C) | 37(2) | 35(2) | 34(2) | 0(1)   | 2(1)  | 9(1)   |
| C(12C) | 30(2) | 33(2) | 27(2) | -4(1)  | 4(1)  | 3(1)   |
| C(13C) | 25(1) | 29(2) | 31(2) | -7(1)  | 8(1)  | -3(1)  |
| C(14C) | 31(2) | 32(2) | 36(2) | -9(1)  | 8(1)  | -7(1)  |
| C(15C) | 35(2) | 34(2) | 48(2) | -12(2) | 13(2) | -11(2) |
| C(16C) | 47(2) | 22(2) | 57(2) | -5(2)  | 16(2) | -8(2)  |
| C(17C) | 38(2) | 25(2) | 41(2) | -3(1)  | 12(2) | -1(1)  |
| C(18C) | 29(2) | 24(2) | 35(2) | -5(1)  | 11(1) | -3(1)  |
| C(19C) | 22(1) | 32(2) | 35(2) | -8(1)  | 4(1)  | -3(1)  |
| C(20C) | 28(2) | 24(2) | 37(2) | -7(1)  | 9(1)  | -2(1)  |
| C(21C) | 31(2) | 28(2) | 42(2) | -9(1)  | 10(1) | -1(1)  |
| C(22C) | 41(2) | 25(2) | 45(2) | -9(1)  | 19(2) | -3(1)  |
| C(23C) | 53(2) | 20(2) | 34(2) | -5(1)  | 18(2) | -2(1)  |
| C(24C) | 40(2) | 18(1) | 32(2) | -3(1)  | 9(1)  | 1(1)   |
| C(25C) | 31(2) | 18(1) | 32(2) | -5(1)  | 9(1)  | -1(1)  |
| N(1D)  | 30(1) | 36(2) | 26(1) | -8(1)  | 5(1)  | -5(1)  |
| N(2D)  | 25(1) | 41(2) | 26(1) | -9(1)  | 2(1)  | -2(1)  |
| N(3D)  | 29(1) | 54(2) | 28(1) | -5(1)  | 5(1)  | -7(1)  |
| N(4D)  | 33(2) | 58(2) | 29(2) | -5(1)  | 7(1)  | 2(1)   |
| C(1D)  | 47(2) | 38(2) | 39(2) | -12(2) | 13(2) | -2(2)  |
| C(2D)  | 58(3) | 57(3) | 33(2) | -12(2) | 9(2)  | -6(2)  |
| C(3D)  | 49(2) | 72(3) | 31(2) | 11(2)  | 8(2)  | 5(2)   |
| C(4D)  | 44(2) | 44(2) | 32(2) | -2(2)  | 7(2)  | -10(2) |
| C(5D)  | 33(2) | 37(2) | 27(2) | -6(1)  | 4(1)  | -3(1)  |
| C(6D)  | 23(2) | 49(2) | 26(2) | -6(1)  | 1(1)  | -3(1)  |
| C(7D)  | 22(2) | 50(2) | 32(2) | -4(2)  | 1(1)  | 2(1)   |
| C(8D)  | 24(2) | 52(2) | 33(2) | -3(2)  | 1(1)  | 3(2)   |
| C(9D)  | 29(2) | 52(2) | 42(2) | 3(2)   | 1(2)  | 6(2)   |
| C(10D) | 31(2) | 51(2) | 47(2) | -6(2)  | -1(2) | 8(2)   |
| C(11D) | 34(2) | 55(2) | 35(2) | -10(2) | 3(1)  | 7(2)   |
| C(12D) | 24(2) | 54(2) | 34(2) | -5(2)  | 2(1)  | 4(2)   |

|        |        |        |       |        |       |        |
|--------|--------|--------|-------|--------|-------|--------|
| C(13D) | 35(2)  | 52(2)  | 30(2) | -7(2)  | 2(1)  | -13(2) |
| C(14D) | 52(2)  | 65(3)  | 42(2) | -8(2)  | 11(2) | -24(2) |
| C(15D) | 89(4)  | 54(3)  | 52(3) | -10(2) | 24(3) | -36(3) |
| C(16D) | 98(4)  | 43(2)  | 49(3) | -10(2) | 18(3) | -22(3) |
| C(17D) | 70(3)  | 42(2)  | 39(2) | -8(2)  | 11(2) | -11(2) |
| C(18D) | 43(2)  | 43(2)  | 30(2) | -7(1)  | 4(2)  | -10(2) |
| C(19D) | 31(2)  | 48(2)  | 27(2) | -5(1)  | 6(1)  | -2(2)  |
| C(20D) | 29(2)  | 42(2)  | 28(2) | -6(1)  | 3(1)  | 2(1)   |
| C(21D) | 37(2)  | 51(2)  | 28(2) | -9(2)  | 1(1)  | 7(2)   |
| C(22D) | 38(2)  | 64(3)  | 33(2) | -14(2) | -7(2) | 7(2)   |
| C(23D) | 25(2)  | 63(3)  | 45(2) | -12(2) | -3(2) | 1(2)   |
| C(24D) | 28(2)  | 50(2)  | 34(2) | -9(2)  | 4(1)  | 0(2)   |
| C(25D) | 28(2)  | 40(2)  | 28(2) | -10(1) | 3(1)  | -4(1)  |
| C(1S)  | 118(8) | 136(9) | 49(4) | -19(5) | 10(4) | 73(7)  |
| Cl(1S) | 93(1)  | 89(1)  | 67(1) | 5(1)   | 16(1) | 20(1)  |
| Cl(2S) | 106(2) | 70(1)  | 88(1) | -2(1)  | 37(1) | -1(1)  |
| Cl(3S) | 104(2) | 74(1)  | 92(1) | 2(1)   | 38(1) | -1(1)  |
| C(1T)  | 118(8) | 136(9) | 49(4) | -19(5) | 10(4) | 73(7)  |
| Cl(1T) | 93(1)  | 89(1)  | 67(1) | 5(1)   | 16(1) | 20(1)  |
| Cl(2T) | 106(2) | 70(1)  | 88(1) | -2(1)  | 37(1) | -1(1)  |
| Cl(3T) | 104(2) | 74(1)  | 92(1) | 2(1)   | 38(1) | -1(1)  |

---

**Table S4.** Hydrogen coordinates ( $\times 10^4$ ) and isotropic displacement parameters ( $\text{\AA}^2 \times 10^3$ ) for **1**.

|        | x        | y        | z        | U(eq)  |
|--------|----------|----------|----------|--------|
| H(4A)  | 3060(40) | 2180(30) | -670(20) | 34(11) |
| H(1AA) | 234      | 4313     | 1808     | 39     |
| H(1AB) | 1449     | 4758     | 1954     | 39     |
| H(2AA) | 1627     | 4224     | 2862     | 49     |
| H(2AB) | 363      | 3985     | 2753     | 49     |
| H(3AA) | 675      | 2452     | 2808     | 59     |
| H(3AB) | 1888     | 2692     | 2733     | 59     |
| H(4AA) | 1215     | 1920     | 1846     | 43     |
| H(4AB) | 90       | 2357     | 1814     | 43     |
| H(5AA) | 73       | 3280     | 974      | 30     |
| H(7AA) | -751     | 1609     | 577      | 39     |
| H(8AA) | -1855    | 1141     | -305     | 47     |
| H(9AA) | -1241    | 1369     | -1188    | 46     |
| H(10A) | 459      | 2080     | -1188    | 38     |
| H(12A) | 1956     | 3263     | -622     | 29     |
| H(14A) | 2859     | 4887     | -181     | 34     |
| H(15A) | 2146     | 6355     | -78      | 40     |
| H(16A) | 830      | 6468     | 498      | 42     |
| H(17A) | 279      | 5139     | 991      | 38     |
| H(19A) | 2696     | 2828     | 1089     | 26     |
| H(21A) | 2791     | 1091     | 1366     | 31     |
| H(22A) | 3673     | -254     | 1193     | 34     |
| H(23A) | 4193     | -483     | 284      | 33     |
| H(24A) | 3696     | 528      | -471     | 31     |
| H(4B)  | 4290(40) | 3530(30) | 570(20)  | 44(12) |
| H(1BA) | 8242     | 7718     | 2522     | 34     |
| H(1BB) | 8467     | 7892     | 1870     | 34     |
| H(2BA) | 10199    | 7752     | 2143     | 42     |

|        |          |          |          |        |
|--------|----------|----------|----------|--------|
| H(2BB) | 10000    | 7807     | 2809     | 42     |
| H(3BA) | 10288    | 6148     | 2155     | 52     |
| H(3BB) | 10411    | 6274     | 2856     | 52     |
| H(4BA) | 8808     | 5207     | 2309     | 39     |
| H(4BB) | 8630     | 5908     | 2841     | 39     |
| H(5BA) | 6963     | 6448     | 2467     | 29     |
| H(7BA) | 6405     | 5069     | 3019     | 46     |
| H(8BA) | 4825     | 4588     | 3346     | 63     |
| H(9BA) | 3286     | 4141     | 2675     | 74     |
| H(10B) | 3313     | 4198     | 1680     | 63     |
| H(12B) | 4213     | 5039     | 915      | 48     |
| H(14B) | 4576     | 6484     | 433      | 40     |
| H(15B) | 4305     | 8071     | 660      | 39     |
| H(16B) | 5362     | 8904     | 1472     | 36     |
| H(17B) | 6601     | 8115     | 2083     | 33     |
| H(19B) | 7372     | 5274     | 1214     | 33     |
| H(21B) | 8217     | 3777     | 1573     | 32     |
| H(22B) | 8241     | 2139     | 1345     | 34     |
| H(23B) | 6716     | 1272     | 817      | 36     |
| H(24B) | 5164     | 2011     | 574      | 39     |
| H(4C)  | 9940(40) | -840(30) | 3940(20) | 46(13) |
| H(1CA) | 5505     | 2437     | 2370     | 41     |
| H(1CB) | 5644     | 2568     | 3070     | 41     |
| H(2CA) | 3937     | 2061     | 3063     | 46     |
| H(2CB) | 3759     | 2169     | 2366     | 46     |
| H(3CA) | 3918     | 447      | 2973     | 38     |
| H(3CB) | 3401     | 556      | 2299     | 38     |
| H(4CA) | 5176     | -161     | 2493     | 35     |
| H(4CB) | 5036     | 630      | 1997     | 35     |
| H(5CA) | 6837     | 1395     | 2221     | 32     |
| H(6CA) | 6837     | 230      | 3498     | 31     |
| H(8CA) | 5949     | -1430    | 3241     | 37     |
| H(9CA) | 6020     | -3033    | 3509     | 43     |
| H(10C) | 7656     | -3568    | 3903     | 46     |
| H(11A) | 9199     | -2551    | 3971     | 42     |
| H(14C) | 9667     | 2028     | 4119     | 40     |



|        |          |         |          |        |
|--------|----------|---------|----------|--------|
| H(15C) | 9730     | 3661    | 3936     | 47     |
| H(16C) | 8543     | 4222    | 3188     | 50     |
| H(17C) | 7268     | 3141    | 2604     | 42     |
| H(19C) | 9973     | 595     | 3557     | 36     |
| H(21C) | 10668    | -29     | 2676     | 40     |
| H(22C) | 10431    | -83     | 1664     | 44     |
| H(23C) | 8730     | -73     | 1113     | 42     |
| H(24C) | 7291     | 61      | 1588     | 36     |
| H(4D)  | 8530(40) | 520(40) | 4590(20) | 58(14) |
| H(1DA) | 6462     | 3647    | 7196     | 50     |
| H(1DB) | 7726     | 3875    | 7266     | 50     |
| H(2DA) | 6814     | 3371    | 8171     | 60     |
| H(2DB) | 8015     | 3163    | 8145     | 60     |
| H(3DA) | 7524     | 1550    | 8008     | 60     |
| H(3DB) | 6343     | 1751    | 8089     | 60     |
| H(4DA) | 6677     | 1115    | 7100     | 49     |
| H(4DB) | 5804     | 1865    | 7125     | 49     |
| H(5DA) | 6105     | 2739    | 6276     | 39     |
| H(6DA) | 8368     | 1528    | 6467     | 40     |
| H(8DA) | 7597     | -196    | 6625     | 45     |
| H(9DA) | 7712     | -1812   | 6394     | 50     |
| H(10D) | 8235     | -2249   | 5507     | 53     |
| H(11B) | 8606     | -1071   | 4861     | 50     |
| H(14D) | 9396     | 3527    | 5270     | 66     |
| H(15D) | 9116     | 5147    | 5344     | 80     |
| H(16D) | 7849     | 5637    | 5874     | 77     |
| H(17D) | 6857     | 4492    | 6326     | 61     |
| H(19D) | 8201     | 2155    | 4781     | 43     |
| H(21D) | 6534     | 1383    | 4103     | 47     |
| H(22D) | 4705     | 1065    | 3981     | 56     |
| H(23D) | 3855     | 1040    | 4789     | 55     |
| H(24D) | 4827     | 1351    | 5723     | 45     |
| H(1SA) | 6180     | 4090    | 4959     | 118    |
| H(1TA) | 5210     | 2683    | 4820     | 118    |

---

**Table S5.** Torsion angles [°] for **1**.

|                            |           |                             |           |
|----------------------------|-----------|-----------------------------|-----------|
| C(5A)-N(1A)-C(1A)-C(2A)    | 155.8(3)  | C(13A)-N(3A)-C(12A)-C(11A)  | -74.3(3)  |
| C(4A)-N(1A)-C(1A)-C(2A)    | 33.9(3)   | C(19A)-N(3A)-C(12A)-C(11A)  | 47.7(3)   |
| N(1A)-C(1A)-C(2A)-C(3A)    | -11.1(4)  | C(6A)-C(11A)-C(12A)-N(4A)   | 105.5(3)  |
| C(1A)-C(2A)-C(3A)-C(4A)    | -15.1(4)  | C(10A)-C(11A)-C(12A)-N(4A)  | -73.3(3)  |
| C(5A)-N(1A)-C(4A)-C(3A)    | -165.8(3) | C(6A)-C(11A)-C(12A)-N(3A)   | -15.0(4)  |
| C(1A)-N(1A)-C(4A)-C(3A)    | -42.8(3)  | C(10A)-C(11A)-C(12A)-N(3A)  | 166.3(3)  |
| C(2A)-C(3A)-C(4A)-N(1A)    | 35.6(4)   | C(19A)-N(3A)-C(13A)-C(14A)  | 164.4(3)  |
| C(1A)-N(1A)-C(5A)-N(2A)    | -175.9(2) | C(12A)-N(3A)-C(13A)-C(14A)  | -76.6(3)  |
| C(4A)-N(1A)-C(5A)-N(2A)    | -58.2(3)  | C(19A)-N(3A)-C(13A)-C(18A)  | -16.7(4)  |
| C(1A)-N(1A)-C(5A)-C(18A)   | 61.1(3)   | C(12A)-N(3A)-C(13A)-C(18A)  | 102.4(3)  |
| C(4A)-N(1A)-C(5A)-C(18A)   | 178.8(3)  | C(18A)-C(13A)-C(14A)-C(15A) | -0.8(5)   |
| C(6A)-N(2A)-C(5A)-N(1A)    | 159.5(2)  | N(3A)-C(13A)-C(14A)-C(15A)  | 178.2(3)  |
| C(19A)-N(2A)-C(5A)-N(1A)   | -77.2(3)  | C(13A)-C(14A)-C(15A)-C(16A) | -1.1(5)   |
| C(6A)-N(2A)-C(5A)-C(18A)   | -76.0(3)  | C(14A)-C(15A)-C(16A)-C(17A) | 1.4(5)    |
| C(19A)-N(2A)-C(5A)-C(18A)  | 47.3(3)   | C(15A)-C(16A)-C(17A)-C(18A) | 0.3(5)    |
| C(19A)-N(2A)-C(6A)-C(11A)  | -18.2(4)  | C(16A)-C(17A)-C(18A)-C(13A) | -2.2(5)   |
| C(5A)-N(2A)-C(6A)-C(11A)   | 104.3(3)  | C(16A)-C(17A)-C(18A)-C(5A)  | -177.7(3) |
| C(19A)-N(2A)-C(6A)-C(7A)   | 160.6(3)  | C(14A)-C(13A)-C(18A)-C(17A) | 2.4(4)    |
| C(5A)-N(2A)-C(6A)-C(7A)    | -77.0(3)  | N(3A)-C(13A)-C(18A)-C(17A)  | -176.5(3) |
| C(11A)-C(6A)-C(7A)-C(8A)   | -0.5(5)   | C(14A)-C(13A)-C(18A)-C(5A)  | 178.0(3)  |
| N(2A)-C(6A)-C(7A)-C(8A)    | -179.3(3) | N(3A)-C(13A)-C(18A)-C(5A)   | -0.9(4)   |
| C(6A)-C(7A)-C(8A)-C(9A)    | 1.1(5)    | N(1A)-C(5A)-C(18A)-C(17A)   | -78.0(4)  |
| C(7A)-C(8A)-C(9A)-C(10A)   | -0.5(6)   | N(2A)-C(5A)-C(18A)-C(17A)   | 160.6(3)  |
| C(8A)-C(9A)-C(10A)-C(11A)  | -0.7(5)   | N(1A)-C(5A)-C(18A)-C(13A)   | 106.6(3)  |
| C(7A)-C(6A)-C(11A)-C(10A)  | -0.6(4)   | N(2A)-C(5A)-C(18A)-C(13A)   | -14.8(4)  |
| N(2A)-C(6A)-C(11A)-C(10A)  | 178.1(3)  | C(13A)-N(3A)-C(19A)-N(2A)   | 51.2(3)   |
| C(7A)-C(6A)-C(11A)-C(12A)  | -179.4(3) | C(12A)-N(3A)-C(19A)-N(2A)   | -70.8(3)  |
| N(2A)-C(6A)-C(11A)-C(12A)  | -0.7(4)   | C(13A)-N(3A)-C(19A)-C(20A)  | 176.5(2)  |
| C(9A)-C(10A)-C(11A)-C(6A)  | 1.3(5)    | C(12A)-N(3A)-C(19A)-C(20A)  | 54.4(3)   |
| C(9A)-C(10A)-C(11A)-C(12A) | -180.0(3) | C(6A)-N(2A)-C(19A)-N(3A)    | 55.0(3)   |
| C(25A)-N(4A)-C(12A)-N(3A)  | 45.7(3)   | C(5A)-N(2A)-C(19A)-N(3A)    | -68.8(3)  |
| C(25A)-N(4A)-C(12A)-C(11A) | -75.8(3)  | C(6A)-N(2A)-C(19A)-C(20A)   | -67.7(3)  |
| C(13A)-N(3A)-C(12A)-N(4A)  | 165.5(2)  | C(5A)-N(2A)-C(19A)-C(20A)   | 168.6(2)  |
| C(19A)-N(3A)-C(12A)-N(4A)  | -72.6(3)  | N(3A)-C(19A)-C(20A)-C(21A)  | 158.4(3)  |

|                             |           |                             |           |
|-----------------------------|-----------|-----------------------------|-----------|
| N(2A)-C(19A)-C(20A)-C(21A)  | -77.3(3)  | N(2B)-C(6B)-C(7B)-C(8B)     | -179.3(3) |
| N(3A)-C(19A)-C(20A)-C(25A)  | -15.5(4)  | C(6B)-C(7B)-C(8B)-C(9B)     | 0.3(5)    |
| N(2A)-C(19A)-C(20A)-C(25A)  | 108.9(3)  | C(7B)-C(8B)-C(9B)-C(10B)    | -0.7(6)   |
| C(25A)-C(20A)-C(21A)-C(22A) | 2.4(4)    | C(8B)-C(9B)-C(10B)-C(11B)   | 0.1(6)    |
| C(19A)-C(20A)-C(21A)-C(22A) | -171.5(3) | C(9B)-C(10B)-C(11B)-C(6B)   | 0.8(5)    |
| C(20A)-C(21A)-C(22A)-C(23A) | 0.9(5)    | C(9B)-C(10B)-C(11B)-C(12B)  | -178.0(3) |
| C(21A)-C(22A)-C(23A)-C(24A) | -3.3(5)   | C(7B)-C(6B)-C(11B)-C(10B)   | -1.2(5)   |
| C(22A)-C(23A)-C(24A)-C(25A) | 2.4(5)    | N(2B)-C(6B)-C(11B)-C(10B)   | 178.7(3)  |
| C(12A)-N(4A)-C(25A)-C(20A)  | -4.5(4)   | C(7B)-C(6B)-C(11B)-C(12B)   | 177.6(3)  |
| C(12A)-N(4A)-C(25A)-C(24A)  | 173.6(3)  | N(2B)-C(6B)-C(11B)-C(12B)   | -2.5(4)   |
| C(21A)-C(20A)-C(25A)-N(4A)  | 174.8(3)  | C(25B)-N(4B)-C(12B)-N(3B)   | 51.7(5)   |
| C(19A)-C(20A)-C(25A)-N(4A)  | -11.3(4)  | C(25B)-N(4B)-C(12B)-C(11B)  | -69.8(5)  |
| C(21A)-C(20A)-C(25A)-C(24A) | -3.3(4)   | C(13B)-N(3B)-C(12B)-N(4B)   | 166.1(3)  |
| C(19A)-C(20A)-C(25A)-C(24A) | 170.5(3)  | C(19B)-N(3B)-C(12B)-N(4B)   | -71.7(4)  |
| C(23A)-C(24A)-C(25A)-N(4A)  | -177.2(3) | C(13B)-N(3B)-C(12B)-C(11B)  | -70.8(3)  |
| C(23A)-C(24A)-C(25A)-C(20A) | 0.9(4)    | C(19B)-N(3B)-C(12B)-C(11B)  | 51.4(3)   |
| C(5B)-N(1B)-C(1B)-C(2B)     | 154.6(3)  | C(10B)-C(11B)-C(12B)-N(4B)  | -77.5(4)  |
| C(4B)-N(1B)-C(1B)-C(2B)     | 33.9(3)   | C(6B)-C(11B)-C(12B)-N(4B)   | 103.7(4)  |
| N(1B)-C(1B)-C(2B)-C(3B)     | -11.3(4)  | C(10B)-C(11B)-C(12B)-N(3B)  | 162.0(3)  |
| C(1B)-C(2B)-C(3B)-C(4B)     | -14.7(4)  | C(6B)-C(11B)-C(12B)-N(3B)   | -16.8(4)  |
| C(5B)-N(1B)-C(4B)-C(3B)     | -164.6(3) | C(19B)-N(3B)-C(13B)-C(14B)  | 170.9(3)  |
| C(1B)-N(1B)-C(4B)-C(3B)     | -43.4(3)  | C(12B)-N(3B)-C(13B)-C(14B)  | -70.3(4)  |
| C(2B)-C(3B)-C(4B)-N(1B)     | 35.6(4)   | C(19B)-N(3B)-C(13B)-C(18B)  | -10.6(5)  |
| C(4B)-N(1B)-C(5B)-N(2B)     | -56.1(3)  | C(12B)-N(3B)-C(13B)-C(18B)  | 108.2(4)  |
| C(1B)-N(1B)-C(5B)-N(2B)     | -172.5(3) | C(18B)-C(13B)-C(14B)-C(15B) | -1.4(5)   |
| C(4B)-N(1B)-C(5B)-C(18B)    | -178.6(3) | N(3B)-C(13B)-C(14B)-C(15B)  | 177.2(3)  |
| C(1B)-N(1B)-C(5B)-C(18B)    | 65.0(3)   | C(13B)-C(14B)-C(15B)-C(16B) | 2.1(6)    |
| C(6B)-N(2B)-C(5B)-N(1B)     | 162.7(3)  | C(14B)-C(15B)-C(16B)-C(17B) | -1.9(5)   |
| C(19B)-N(2B)-C(5B)-N(1B)    | -74.3(3)  | C(15B)-C(16B)-C(17B)-C(18B) | 1.1(5)    |
| C(6B)-N(2B)-C(5B)-C(18B)    | -72.4(3)  | C(16B)-C(17B)-C(18B)-C(13B) | -0.4(5)   |
| C(19B)-N(2B)-C(5B)-C(18B)   | 50.6(3)   | C(16B)-C(17B)-C(18B)-C(5B)  | -172.6(3) |
| C(19B)-N(2B)-C(6B)-C(7B)    | 165.2(3)  | C(14B)-C(13B)-C(18B)-C(17B) | 0.5(5)    |
| C(5B)-N(2B)-C(6B)-C(7B)     | -73.2(4)  | N(3B)-C(13B)-C(18B)-C(17B)  | -177.9(3) |
| C(19B)-N(2B)-C(6B)-C(11B)   | -14.7(4)  | C(14B)-C(13B)-C(18B)-C(5B)  | 172.8(3)  |
| C(5B)-N(2B)-C(6B)-C(11B)    | 106.9(3)  | N(3B)-C(13B)-C(18B)-C(5B)   | -5.6(5)   |
| C(11B)-C(6B)-C(7B)-C(8B)    | 0.6(5)    | N(1B)-C(5B)-C(18B)-C(17B)   | -81.3(4)  |

|                             |           |                            |           |
|-----------------------------|-----------|----------------------------|-----------|
| N(2B)-C(5B)-C(18B)-C(17B)   | 157.1(3)  | C(1C)-N(1C)-C(5C)-N(2C)    | -177.5(3) |
| N(1B)-C(5B)-C(18B)-C(13B)   | 106.7(3)  | C(4C)-N(1C)-C(5C)-C(18C)   | 179.7(3)  |
| N(2B)-C(5B)-C(18B)-C(13B)   | -15.0(4)  | C(1C)-N(1C)-C(5C)-C(18C)   | 61.5(4)   |
| C(6B)-N(2B)-C(19B)-N(3B)    | 52.9(3)   | C(25C)-N(2C)-C(5C)-N(1C)   | 166.2(2)  |
| C(5B)-N(2B)-C(19B)-N(3B)    | -70.3(3)  | C(6C)-N(2C)-C(5C)-N(1C)    | -71.2(3)  |
| C(6B)-N(2B)-C(19B)-C(20B)   | -70.8(3)  | C(25C)-N(2C)-C(5C)-C(18C)  | -70.9(3)  |
| C(5B)-N(2B)-C(19B)-C(20B)   | 166.1(2)  | C(6C)-N(2C)-C(5C)-C(18C)   | 51.7(3)   |
| C(13B)-N(3B)-C(19B)-N(2B)   | 48.1(4)   | C(25C)-N(2C)-C(6C)-N(3C)   | 52.1(3)   |
| C(12B)-N(3B)-C(19B)-N(2B)   | -73.1(3)  | C(5C)-N(2C)-C(6C)-N(3C)    | -70.7(3)  |
| C(13B)-N(3B)-C(19B)-C(20B)  | 172.8(3)  | C(25C)-N(2C)-C(6C)-C(7C)   | -71.8(3)  |
| C(12B)-N(3B)-C(19B)-C(20B)  | 51.6(4)   | C(5C)-N(2C)-C(6C)-C(7C)    | 165.4(2)  |
| N(2B)-C(19B)-C(20B)-C(21B)  | -73.9(4)  | C(13C)-N(3C)-C(6C)-N(2C)   | 49.0(3)   |
| N(3B)-C(19B)-C(20B)-C(21B)  | 162.0(3)  | C(19C)-N(3C)-C(6C)-N(2C)   | -72.7(3)  |
| N(2B)-C(19B)-C(20B)-C(25B)  | 109.4(4)  | C(13C)-N(3C)-C(6C)-C(7C)   | 175.5(2)  |
| N(3B)-C(19B)-C(20B)-C(25B)  | -14.7(5)  | C(19C)-N(3C)-C(6C)-C(7C)   | 53.8(3)   |
| C(25B)-C(20B)-C(21B)-C(22B) | 1.3(5)    | N(2C)-C(6C)-C(7C)-C(8C)    | -77.6(4)  |
| C(19B)-C(20B)-C(21B)-C(22B) | -175.5(3) | N(3C)-C(6C)-C(7C)-C(8C)    | 157.4(3)  |
| C(20B)-C(21B)-C(22B)-C(23B) | 1.1(5)    | N(2C)-C(6C)-C(7C)-C(12C)   | 108.0(3)  |
| C(21B)-C(22B)-C(23B)-C(24B) | -2.1(5)   | N(3C)-C(6C)-C(7C)-C(12C)   | -17.0(4)  |
| C(22B)-C(23B)-C(24B)-C(25B) | 0.9(6)    | C(12C)-C(7C)-C(8C)-C(9C)   | 1.2(5)    |
| C(12B)-N(4B)-C(25B)-C(24B)  | 166.7(4)  | C(6C)-C(7C)-C(8C)-C(9C)    | -173.4(3) |
| C(12B)-N(4B)-C(25B)-C(20B)  | -12.7(6)  | C(7C)-C(8C)-C(9C)-C(10C)   | 1.2(5)    |
| C(23B)-C(24B)-C(25B)-N(4B)  | -177.9(4) | C(8C)-C(9C)-C(10C)-C(11C)  | -2.2(6)   |
| C(23B)-C(24B)-C(25B)-C(20B) | 1.5(6)    | C(9C)-C(10C)-C(11C)-C(12C) | 0.8(6)    |
| C(21B)-C(20B)-C(25B)-N(4B)  | 176.8(4)  | C(19C)-N(4C)-C(12C)-C(11C) | 173.7(3)  |
| C(19B)-C(20B)-C(25B)-N(4B)  | -6.5(6)   | C(19C)-N(4C)-C(12C)-C(7C)  | -5.3(5)   |
| C(21B)-C(20B)-C(25B)-C(24B) | -2.5(6)   | C(10C)-C(11C)-C(12C)-N(4C) | -177.4(3) |
| C(19B)-C(20B)-C(25B)-C(24B) | 174.2(3)  | C(10C)-C(11C)-C(12C)-C(7C) | 1.6(5)    |
| C(5C)-N(1C)-C(1C)-C(2C)     | 160.6(3)  | C(8C)-C(7C)-C(12C)-N(4C)   | 176.4(3)  |
| C(4C)-N(1C)-C(1C)-C(2C)     | 37.1(3)   | C(6C)-C(7C)-C(12C)-N(4C)   | -9.1(5)   |
| N(1C)-C(1C)-C(2C)-C(3C)     | -12.2(4)  | C(8C)-C(7C)-C(12C)-C(11C)  | -2.6(5)   |
| C(1C)-C(2C)-C(3C)-C(4C)     | -16.0(4)  | C(6C)-C(7C)-C(12C)-C(11C)  | 171.8(3)  |
| C(5C)-N(1C)-C(4C)-C(3C)     | -171.6(3) | C(6C)-N(3C)-C(13C)-C(18C)  | -13.1(4)  |
| C(1C)-N(1C)-C(4C)-C(3C)     | -47.3(3)  | C(19C)-N(3C)-C(13C)-C(18C) | 105.5(3)  |
| C(2C)-C(3C)-C(4C)-N(1C)     | 38.6(3)   | C(6C)-N(3C)-C(13C)-C(14C)  | 168.2(3)  |
| C(4C)-N(1C)-C(5C)-N(2C)     | -59.2(3)  | C(19C)-N(3C)-C(13C)-C(14C) | -73.2(4)  |

|                             |           |                            |           |
|-----------------------------|-----------|----------------------------|-----------|
| C(18C)-C(13C)-C(14C)-C(15C) | 0.8(5)    | C(6C)-N(2C)-C(25C)-C(24C)  | 165.0(3)  |
| N(3C)-C(13C)-C(14C)-C(15C)  | 179.6(3)  | C(5C)-N(2C)-C(25C)-C(24C)  | -74.1(3)  |
| C(13C)-C(14C)-C(15C)-C(16C) | -0.8(5)   | C(6C)-N(2C)-C(25C)-C(20C)  | -15.5(4)  |
| C(14C)-C(15C)-C(16C)-C(17C) | -0.1(6)   | C(5C)-N(2C)-C(25C)-C(20C)  | 105.3(3)  |
| C(15C)-C(16C)-C(17C)-C(18C) | 1.1(6)    | C(4D)-N(1D)-C(1D)-C(2D)    | 42.4(4)   |
| C(14C)-C(13C)-C(18C)-C(17C) | 0.1(5)    | C(5D)-N(1D)-C(1D)-C(2D)    | 165.5(3)  |
| N(3C)-C(13C)-C(18C)-C(17C)  | -178.5(3) | N(1D)-C(1D)-C(2D)-C(3D)    | -22.7(4)  |
| C(14C)-C(13C)-C(18C)-C(5C)  | 176.8(3)  | C(1D)-C(2D)-C(3D)-C(4D)    | -4.5(5)   |
| N(3C)-C(13C)-C(18C)-C(5C)   | -1.9(5)   | C(5D)-N(1D)-C(4D)-C(3D)    | -170.6(3) |
| C(16C)-C(17C)-C(18C)-C(13C) | -1.1(5)   | C(1D)-N(1D)-C(4D)-C(3D)    | -46.7(4)  |
| C(16C)-C(17C)-C(18C)-C(5C)  | -177.8(3) | C(2D)-C(3D)-C(4D)-N(1D)    | 30.7(4)   |
| N(1C)-C(5C)-C(18C)-C(13C)   | 102.3(3)  | C(4D)-N(1D)-C(5D)-N(2D)    | -57.8(4)  |
| N(2C)-C(5C)-C(18C)-C(13C)   | -17.9(4)  | C(1D)-N(1D)-C(5D)-N(2D)    | -175.5(3) |
| N(1C)-C(5C)-C(18C)-C(17C)   | -81.1(4)  | C(4D)-N(1D)-C(5D)-C(18D)   | -179.5(3) |
| N(2C)-C(5C)-C(18C)-C(17C)   | 158.7(3)  | C(1D)-N(1D)-C(5D)-C(18D)   | 62.8(4)   |
| C(12C)-N(4C)-C(19C)-N(3C)   | 44.9(4)   | C(25D)-N(2D)-C(5D)-N(1D)   | 164.7(3)  |
| C(12C)-N(4C)-C(19C)-C(20C)  | -76.5(4)  | C(6D)-N(2D)-C(5D)-N(1D)    | -72.1(3)  |
| C(13C)-N(3C)-C(19C)-N(4C)   | 168.4(3)  | C(25D)-N(2D)-C(5D)-C(18D)  | -72.8(4)  |
| C(6C)-N(3C)-C(19C)-N(4C)    | -70.1(3)  | C(6D)-N(2D)-C(5D)-C(18D)   | 50.4(4)   |
| C(13C)-N(3C)-C(19C)-C(20C)  | -69.0(3)  | C(25D)-N(2D)-C(6D)-N(3D)   | 56.7(4)   |
| C(6C)-N(3C)-C(19C)-C(20C)   | 52.6(3)   | C(5D)-N(2D)-C(6D)-N(3D)    | -68.3(3)  |
| N(4C)-C(19C)-C(20C)-C(21C)  | -78.9(4)  | C(25D)-N(2D)-C(6D)-C(7D)   | -66.4(4)  |
| N(3C)-C(19C)-C(20C)-C(21C)  | 159.4(3)  | C(5D)-N(2D)-C(6D)-C(7D)    | 168.6(3)  |
| N(4C)-C(19C)-C(20C)-C(25C)  | 102.0(3)  | C(13D)-N(3D)-C(6D)-N(2D)   | 48.1(4)   |
| N(3C)-C(19C)-C(20C)-C(25C)  | -19.7(4)  | C(19D)-N(3D)-C(6D)-N(2D)   | -74.0(3)  |
| C(25C)-C(20C)-C(21C)-C(22C) | 0.9(5)    | C(13D)-N(3D)-C(6D)-C(7D)   | 171.5(3)  |
| C(19C)-C(20C)-C(21C)-C(22C) | -178.2(3) | C(19D)-N(3D)-C(6D)-C(7D)   | 49.3(4)   |
| C(20C)-C(21C)-C(22C)-C(23C) | -1.9(5)   | N(2D)-C(6D)-C(7D)-C(8D)    | -69.5(4)  |
| C(21C)-C(22C)-C(23C)-C(24C) | 1.4(5)    | N(3D)-C(6D)-C(7D)-C(8D)    | 167.1(3)  |
| C(22C)-C(23C)-C(24C)-C(25C) | 0.0(5)    | N(2D)-C(6D)-C(7D)-C(12D)   | 109.9(4)  |
| C(23C)-C(24C)-C(25C)-C(20C) | -1.0(5)   | N(3D)-C(6D)-C(7D)-C(12D)   | -13.5(4)  |
| C(23C)-C(24C)-C(25C)-N(2C)  | 178.5(3)  | C(12D)-C(7D)-C(8D)-C(9D)   | 1.9(5)    |
| C(21C)-C(20C)-C(25C)-C(24C) | 0.5(5)    | C(6D)-C(7D)-C(8D)-C(9D)    | -178.6(3) |
| C(19C)-C(20C)-C(25C)-C(24C) | 179.6(3)  | C(7D)-C(8D)-C(9D)-C(10D)   | 0.1(5)    |
| C(21C)-C(20C)-C(25C)-N(2C)  | -178.9(3) | C(8D)-C(9D)-C(10D)-C(11D)  | -0.9(5)   |
| C(19C)-C(20C)-C(25C)-N(2C)  | 0.2(5)    | C(9D)-C(10D)-C(11D)-C(12D) | -0.5(6)   |

|                             |           |                             |           |
|-----------------------------|-----------|-----------------------------|-----------|
| C(19D)-N(4D)-C(12D)-C(11D)  | 159.0(3)  | N(2D)-C(5D)-C(18D)-C(13D)   | -17.5(5)  |
| C(19D)-N(4D)-C(12D)-C(7D)   | -21.5(5)  | C(12D)-N(4D)-C(19D)-N(3D)   | 59.8(4)   |
| C(10D)-C(11D)-C(12D)-N(4D)  | -178.0(3) | C(12D)-N(4D)-C(19D)-C(20D)  | -61.4(4)  |
| C(10D)-C(11D)-C(12D)-C(7D)  | 2.6(5)    | C(13D)-N(3D)-C(19D)-N(4D)   | 162.9(3)  |
| C(8D)-C(7D)-C(12D)-N(4D)    | 177.3(3)  | C(6D)-N(3D)-C(19D)-N(4D)    | -74.1(3)  |
| C(6D)-C(7D)-C(12D)-N(4D)    | -2.2(5)   | C(13D)-N(3D)-C(19D)-C(20D)  | -74.2(4)  |
| C(8D)-C(7D)-C(12D)-C(11D)   | -3.2(5)   | C(6D)-N(3D)-C(19D)-C(20D)   | 48.7(4)   |
| C(6D)-C(7D)-C(12D)-C(11D)   | 177.3(3)  | N(4D)-C(19D)-C(20D)-C(25D)  | 105.2(4)  |
| C(6D)-N(3D)-C(13D)-C(14D)   | 168.9(3)  | N(3D)-C(19D)-C(20D)-C(25D)  | -14.1(5)  |
| C(19D)-N(3D)-C(13D)-C(14D)  | -72.1(4)  | N(4D)-C(19D)-C(20D)-C(21D)  | -74.1(5)  |
| C(6D)-N(3D)-C(13D)-C(18D)   | -14.1(5)  | N(3D)-C(19D)-C(20D)-C(21D)  | 166.6(3)  |
| C(19D)-N(3D)-C(13D)-C(18D)  | 104.9(4)  | C(25D)-C(20D)-C(21D)-C(22D) | -1.6(6)   |
| C(18D)-C(13D)-C(14D)-C(15D) | -0.4(6)   | C(19D)-C(20D)-C(21D)-C(22D) | 177.7(4)  |
| N(3D)-C(13D)-C(14D)-C(15D)  | 176.7(4)  | C(20D)-C(21D)-C(22D)-C(23D) | 1.5(7)    |
| C(13D)-C(14D)-C(15D)-C(16D) | 0.0(8)    | C(21D)-C(22D)-C(23D)-C(24D) | 0.4(7)    |
| C(14D)-C(15D)-C(16D)-C(17D) | 0.0(8)    | C(22D)-C(23D)-C(24D)-C(25D) | -2.1(7)   |
| C(15D)-C(16D)-C(17D)-C(18D) | 0.6(8)    | C(21D)-C(20D)-C(25D)-C(24D) | 0.0(6)    |
| C(16D)-C(17D)-C(18D)-C(13D) | -1.0(6)   | C(19D)-C(20D)-C(25D)-C(24D) | -179.3(4) |
| C(16D)-C(17D)-C(18D)-C(5D)  | -176.0(4) | C(21D)-C(20D)-C(25D)-N(2D)  | 176.8(3)  |
| C(14D)-C(13D)-C(18D)-C(17D) | 0.9(6)    | C(19D)-C(20D)-C(25D)-N(2D)  | -2.5(6)   |
| N(3D)-C(13D)-C(18D)-C(17D)  | -176.0(4) | C(23D)-C(24D)-C(25D)-C(20D) | 1.9(6)    |
| C(14D)-C(13D)-C(18D)-C(5D)  | 176.0(4)  | C(23D)-C(24D)-C(25D)-N(2D)  | -175.0(4) |
| N(3D)-C(13D)-C(18D)-C(5D)   | -0.9(5)   | C(6D)-N(2D)-C(25D)-C(20D)   | -17.7(5)  |
| N(1D)-C(5D)-C(18D)-C(17D)   | -82.2(4)  | C(5D)-N(2D)-C(25D)-C(20D)   | 105.1(4)  |
| N(2D)-C(5D)-C(18D)-C(17D)   | 157.4(3)  | C(6D)-N(2D)-C(25D)-C(24D)   | 159.2(3)  |
| N(1D)-C(5D)-C(18D)-C(13D)   | 102.8(4)  | C(5D)-N(2D)-C(25D)-C(24D)   | -78.1(4)  |

---

Symmetry transformations used to generate equivalent atoms:

-----  
! Optimized Parameters !

! (Angstroms and Degrees) !

| ! Name | Definition | Value  | Derivative Info. | ! |
|--------|------------|--------|------------------|---|
| ! R1   | R(1,2)     | 1.5538 | -DE/DX = -0.0001 | ! |
| ! R2   | R(1,13)    | 1.5197 | -DE/DX = 0.0     | ! |
| ! R3   | R(1,25)    | 1.4133 | -DE/DX = 0.0     | ! |
| ! R4   | R(1,53)    | 1.0973 | -DE/DX = 0.0     | ! |
| ! R5   | R(2,3)     | 2.3613 | -DE/DX = 0.0     | ! |
| ! R6   | R(2,4)     | 1.423  | -DE/DX = 0.0     | ! |
| ! R7   | R(2,11)    | 1.4169 | -DE/DX = 0.0     | ! |
| ! R8   | R(3,4)     | 1.3948 | -DE/DX = 0.0     | ! |
| ! R9   | R(3,16)    | 1.3824 | -DE/DX = 0.0     | ! |
| ! R10  | R(3,30)    | 1.0874 | -DE/DX = 0.0     | ! |
| ! R11  | R(4,5)     | 1.397  | -DE/DX = 0.0     | ! |
| ! R12  | R(4,12)    | 2.5869 | -DE/DX = 0.0     | ! |
| ! R13  | R(5,13)    | 1.3962 | -DE/DX = 0.0     | ! |
| ! R14  | R(5,15)    | 3.5605 | -DE/DX = 0.0     | ! |
| ! R15  | R(5,16)    | 3.3038 | -DE/DX = 0.0     | ! |
| ! R16  | R(5,21)    | 1.3952 | -DE/DX = 0.0     | ! |
| ! R17  | R(6,7)     | 1.4086 | -DE/DX = 0.0     | ! |
| ! R18  | R(6,11)    | 1.4205 | -DE/DX = 0.0     | ! |
| ! R19  | R(6,12)    | 1.4873 | -DE/DX = 0.0     | ! |
| ! R20  | R(7,8)     | 1.3938 | -DE/DX = 0.0     | ! |
| ! R21  | R(7,31)    | 1.0867 | -DE/DX = 0.0     | ! |
| ! R22  | R(8,9)     | 1.3951 | -DE/DX = 0.0     | ! |

|       |          |        |              |   |
|-------|----------|--------|--------------|---|
| ! R23 | R(8,32)  | 1.0859 | -DE/DX = 0.0 | ! |
| ! R24 | R(9,10)  | 1.3918 | -DE/DX = 0.0 | ! |
| ! R25 | R(9,33)  | 1.0861 | -DE/DX = 0.0 | ! |
| ! R26 | R(10,11) | 1.4003 | -DE/DX = 0.0 | ! |
| ! R27 | R(10,34) | 1.0852 | -DE/DX = 0.0 | ! |
| ! R28 | R(12,14) | 1.3548 | -DE/DX = 0.0 | ! |
| ! R29 | R(12,35) | 1.0879 | -DE/DX = 0.0 | ! |
| ! R30 | R(13,24) | 1.3876 | -DE/DX = 0.0 | ! |
| ! R31 | R(14,15) | 1.3769 | -DE/DX = 0.0 | ! |
| ! R32 | R(14,36) | 1.0138 | -DE/DX = 0.0 | ! |
| ! R33 | R(15,16) | 1.4465 | -DE/DX = 0.0 | ! |
| ! R34 | R(15,17) | 1.4237 | -DE/DX = 0.0 | ! |
| ! R35 | R(16,20) | 1.4456 | -DE/DX = 0.0 | ! |
| ! R36 | R(17,18) | 1.3706 | -DE/DX = 0.0 | ! |
| ! R37 | R(17,37) | 1.0901 | -DE/DX = 0.0 | ! |
| ! R38 | R(18,19) | 1.4289 | -DE/DX = 0.0 | ! |
| ! R39 | R(18,38) | 1.0849 | -DE/DX = 0.0 | ! |
| ! R40 | R(19,20) | 1.3651 | -DE/DX = 0.0 | ! |
| ! R41 | R(19,39) | 1.0863 | -DE/DX = 0.0 | ! |
| ! R42 | R(20,40) | 1.0871 | -DE/DX = 0.0 | ! |
| ! R43 | R(21,22) | 1.398  | -DE/DX = 0.0 | ! |
| ! R44 | R(21,41) | 1.0837 | -DE/DX = 0.0 | ! |
| ! R45 | R(22,23) | 1.3986 | -DE/DX = 0.0 | ! |
| ! R46 | R(22,42) | 1.0864 | -DE/DX = 0.0 | ! |
| ! R47 | R(23,24) | 1.4007 | -DE/DX = 0.0 | ! |
| ! R48 | R(23,43) | 1.0855 | -DE/DX = 0.0 | ! |
| ! R49 | R(24,44) | 1.0866 | -DE/DX = 0.0 | ! |
| ! R50 | R(25,26) | 1.4678 | -DE/DX = 0.0 | ! |



|       |            |          |              |   |
|-------|------------|----------|--------------|---|
| ! R51 | R(25,29)   | 1.4618   | -DE/DX = 0.0 | ! |
| ! R52 | R(26,27)   | 1.5389   | -DE/DX = 0.0 | ! |
| ! R53 | R(26,45)   | 1.095    | -DE/DX = 0.0 | ! |
| ! R54 | R(26,46)   | 1.0997   | -DE/DX = 0.0 | ! |
| ! R55 | R(27,28)   | 1.5385   | -DE/DX = 0.0 | ! |
| ! R56 | R(27,47)   | 1.0956   | -DE/DX = 0.0 | ! |
| ! R57 | R(27,48)   | 1.0936   | -DE/DX = 0.0 | ! |
| ! R58 | R(28,29)   | 1.5335   | -DE/DX = 0.0 | ! |
| ! R59 | R(28,49)   | 1.0935   | -DE/DX = 0.0 | ! |
| ! R60 | R(28,50)   | 1.096    | -DE/DX = 0.0 | ! |
| ! R61 | R(29,51)   | 1.1012   | -DE/DX = 0.0 | ! |
| ! R62 | R(29,52)   | 1.0977   | -DE/DX = 0.0 | ! |
| ! A1  | A(2,1,13)  | 100.4722 | -DE/DX = 0.0 | ! |
| ! A2  | A(2,1,25)  | 118.0229 | -DE/DX = 0.0 | ! |
| ! A3  | A(2,1,53)  | 105.823  | -DE/DX = 0.0 | ! |
| ! A4  | A(13,1,25) | 114.6692 | -DE/DX = 0.0 | ! |
| ! A5  | A(13,1,53) | 110.7256 | -DE/DX = 0.0 | ! |
| ! A6  | A(25,1,53) | 106.7597 | -DE/DX = 0.0 | ! |
| ! A7  | A(1,2,3)   | 135.3236 | -DE/DX = 0.0 | ! |
| ! A8  | A(1,2,4)   | 108.6712 | -DE/DX = 0.0 | ! |
| ! A9  | A(1,2,11)  | 121.2776 | -DE/DX = 0.0 | ! |
| ! A10 | A(3,2,11)  | 98.8668  | -DE/DX = 0.0 | ! |
| ! A11 | A(4,2,11)  | 109.2217 | -DE/DX = 0.0 | ! |
| ! A12 | A(2,3,16)  | 143.0287 | -DE/DX = 0.0 | ! |
| ! A13 | A(2,3,30)  | 87.3905  | -DE/DX = 0.0 | ! |
| ! A14 | A(4,3,16)  | 122.3951 | -DE/DX = 0.0 | ! |
| ! A15 | A(4,3,30)  | 115.5214 | -DE/DX = 0.0 | ! |
| ! A16 | A(16,3,30) | 121.8549 | -DE/DX = 0.0 | ! |

|       |            |          |              |   |
|-------|------------|----------|--------------|---|
| ! A17 | A(2,4,5)   | 109.8818 | -DE/DX = 0.0 | ! |
| ! A18 | A(2,4,12)  | 94.343   | -DE/DX = 0.0 | ! |
| ! A19 | A(3,4,5)   | 126.934  | -DE/DX = 0.0 | ! |
| ! A20 | A(3,4,12)  | 101.0475 | -DE/DX = 0.0 | ! |
| ! A21 | A(5,4,12)  | 104.1313 | -DE/DX = 0.0 | ! |
| ! A22 | A(4,5,13)  | 110.1656 | -DE/DX = 0.0 | ! |
| ! A23 | A(4,5,15)  | 53.4313  | -DE/DX = 0.0 | ! |
| ! A24 | A(4,5,16)  | 41.21    | -DE/DX = 0.0 | ! |
| ! A25 | A(4,5,21)  | 128.2094 | -DE/DX = 0.0 | ! |
| ! A26 | A(13,5,15) | 152.2145 | -DE/DX = 0.0 | ! |
| ! A27 | A(13,5,16) | 151.2967 | -DE/DX = 0.0 | ! |
| ! A28 | A(13,5,21) | 121.6116 | -DE/DX = 0.0 | ! |
| ! A29 | A(15,5,21) | 78.8364  | -DE/DX = 0.0 | ! |
| ! A30 | A(16,5,21) | 87.0073  | -DE/DX = 0.0 | ! |
| ! A31 | A(7,6,11)  | 117.1495 | -DE/DX = 0.0 | ! |
| ! A32 | A(7,6,12)  | 115.9622 | -DE/DX = 0.0 | ! |
| ! A33 | A(11,6,12) | 125.7949 | -DE/DX = 0.0 | ! |
| ! A34 | A(6,7,8)   | 122.4395 | -DE/DX = 0.0 | ! |
| ! A35 | A(6,7,31)  | 118.3003 | -DE/DX = 0.0 | ! |
| ! A36 | A(8,7,31)  | 119.2602 | -DE/DX = 0.0 | ! |
| ! A37 | A(7,8,9)   | 119.4161 | -DE/DX = 0.0 | ! |
| ! A38 | A(7,8,32)  | 119.968  | -DE/DX = 0.0 | ! |
| ! A39 | A(9,8,32)  | 120.6094 | -DE/DX = 0.0 | ! |
| ! A40 | A(8,9,10)  | 119.6416 | -DE/DX = 0.0 | ! |
| ! A41 | A(8,9,33)  | 120.503  | -DE/DX = 0.0 | ! |
| ! A42 | A(10,9,33) | 119.8418 | -DE/DX = 0.0 | ! |
| ! A43 | A(9,10,11) | 121.1189 | -DE/DX = 0.0 | ! |
| ! A44 | A(9,10,34) | 120.625  | -DE/DX = 0.0 | ! |

|       |             |          |              |   |
|-------|-------------|----------|--------------|---|
| ! A45 | A(11,10,34) | 118.25   | -DE/DX = 0.0 | ! |
| ! A46 | A(2,11,6)   | 121.5568 | -DE/DX = 0.0 | ! |
| ! A47 | A(2,11,10)  | 118.1837 | -DE/DX = 0.0 | ! |
| ! A48 | A(6,11,10)  | 120.1905 | -DE/DX = 0.0 | ! |
| ! A49 | A(4,12,6)   | 76.8897  | -DE/DX = 0.0 | ! |
| ! A50 | A(4,12,14)  | 87.1771  | -DE/DX = 0.0 | ! |
| ! A51 | A(4,12,35)  | 137.3894 | -DE/DX = 0.0 | ! |
| ! A52 | A(6,12,14)  | 132.1305 | -DE/DX = 0.0 | ! |
| ! A53 | A(6,12,35)  | 112.4718 | -DE/DX = 0.0 | ! |
| ! A54 | A(14,12,35) | 109.7063 | -DE/DX = 0.0 | ! |
| ! A55 | A(1,13,5)   | 110.7704 | -DE/DX = 0.0 | ! |
| ! A56 | A(1,13,24)  | 128.8171 | -DE/DX = 0.0 | ! |
| ! A57 | A(5,13,24)  | 120.3808 | -DE/DX = 0.0 | ! |
| ! A58 | A(12,14,15) | 136.4193 | -DE/DX = 0.0 | ! |
| ! A59 | A(12,14,36) | 112.0182 | -DE/DX = 0.0 | ! |
| ! A60 | A(15,14,36) | 111.5581 | -DE/DX = 0.0 | ! |
| ! A61 | A(5,15,14)  | 71.1854  | -DE/DX = 0.0 | ! |
| ! A62 | A(5,15,17)  | 140.8569 | -DE/DX = 0.0 | ! |
| ! A63 | A(14,15,16) | 123.8626 | -DE/DX = 0.0 | ! |
| ! A64 | A(14,15,17) | 116.3582 | -DE/DX = 0.0 | ! |
| ! A65 | A(16,15,17) | 119.6924 | -DE/DX = 0.0 | ! |
| ! A66 | A(3,16,5)   | 43.8472  | -DE/DX = 0.0 | ! |
| ! A67 | A(3,16,15)  | 124.0664 | -DE/DX = 0.0 | ! |
| ! A68 | A(3,16,20)  | 120.2332 | -DE/DX = 0.0 | ! |
| ! A69 | A(5,16,20)  | 143.4173 | -DE/DX = 0.0 | ! |
| ! A70 | A(15,16,20) | 115.6559 | -DE/DX = 0.0 | ! |
| ! A71 | A(15,17,18) | 121.3345 | -DE/DX = 0.0 | ! |
| ! A72 | A(15,17,37) | 118.4649 | -DE/DX = 0.0 | ! |

|        |             |          |              |   |
|--------|-------------|----------|--------------|---|
| ! A73  | A(18,17,37) | 120.1178 | -DE/DX = 0.0 | ! |
| ! A74  | A(17,18,19) | 119.231  | -DE/DX = 0.0 | ! |
| ! A75  | A(17,18,38) | 120.4263 | -DE/DX = 0.0 | ! |
| ! A76  | A(19,18,38) | 120.3142 | -DE/DX = 0.0 | ! |
| ! A77  | A(18,19,20) | 120.6139 | -DE/DX = 0.0 | ! |
| ! A78  | A(18,19,39) | 119.4847 | -DE/DX = 0.0 | ! |
| ! A79  | A(20,19,39) | 119.8923 | -DE/DX = 0.0 | ! |
| ! A80  | A(16,20,19) | 122.072  | -DE/DX = 0.0 | ! |
| ! A81  | A(16,20,40) | 117.4249 | -DE/DX = 0.0 | ! |
| ! A82  | A(19,20,40) | 120.4215 | -DE/DX = 0.0 | ! |
| ! A83  | A(5,21,22)  | 117.4793 | -DE/DX = 0.0 | ! |
| ! A84  | A(5,21,41)  | 120.8959 | -DE/DX = 0.0 | ! |
| ! A85  | A(22,21,41) | 121.6234 | -DE/DX = 0.0 | ! |
| ! A86  | A(21,22,23) | 121.5093 | -DE/DX = 0.0 | ! |
| ! A87  | A(21,22,42) | 118.9752 | -DE/DX = 0.0 | ! |
| ! A88  | A(23,22,42) | 119.5154 | -DE/DX = 0.0 | ! |
| ! A89  | A(22,23,24) | 119.9881 | -DE/DX = 0.0 | ! |
| ! A90  | A(22,23,43) | 120.0015 | -DE/DX = 0.0 | ! |
| ! A91  | A(24,23,43) | 120.0077 | -DE/DX = 0.0 | ! |
| ! A92  | A(13,24,23) | 119.012  | -DE/DX = 0.0 | ! |
| ! A93  | A(13,24,44) | 120.0815 | -DE/DX = 0.0 | ! |
| ! A94  | A(23,24,44) | 120.9037 | -DE/DX = 0.0 | ! |
| ! A95  | A(1,25,26)  | 123.5487 | -DE/DX = 0.0 | ! |
| ! A96  | A(1,25,29)  | 122.8919 | -DE/DX = 0.0 | ! |
| ! A97  | A(26,25,29) | 112.5071 | -DE/DX = 0.0 | ! |
| ! A98  | A(25,26,27) | 103.6051 | -DE/DX = 0.0 | ! |
| ! A99  | A(25,26,45) | 112.096  | -DE/DX = 0.0 | ! |
| ! A100 | A(25,26,46) | 110.7799 | -DE/DX = 0.0 | ! |

|        |              |          |              |   |
|--------|--------------|----------|--------------|---|
| ! A101 | A(27,26,45)  | 111.7069 | -DE/DX = 0.0 | ! |
| ! A102 | A(27,26,46)  | 111.4993 | -DE/DX = 0.0 | ! |
| ! A103 | A(45,26,46)  | 107.2238 | -DE/DX = 0.0 | ! |
| ! A104 | A(26,27,28)  | 103.6335 | -DE/DX = 0.0 | ! |
| ! A105 | A(26,27,47)  | 109.7762 | -DE/DX = 0.0 | ! |
| ! A106 | A(26,27,48)  | 112.5034 | -DE/DX = 0.0 | ! |
| ! A107 | A(28,27,47)  | 109.6758 | -DE/DX = 0.0 | ! |
| ! A108 | A(28,27,48)  | 113.3405 | -DE/DX = 0.0 | ! |
| ! A109 | A(47,27,48)  | 107.8537 | -DE/DX = 0.0 | ! |
| ! A110 | A(27,28,29)  | 102.4651 | -DE/DX = 0.0 | ! |
| ! A111 | A(27,28,49)  | 113.2633 | -DE/DX = 0.0 | ! |
| ! A112 | A(27,28,50)  | 110.2766 | -DE/DX = 0.0 | ! |
| ! A113 | A(29,28,49)  | 112.6867 | -DE/DX = 0.0 | ! |
| ! A114 | A(29,28,50)  | 109.9759 | -DE/DX = 0.0 | ! |
| ! A115 | A(49,28,50)  | 108.1012 | -DE/DX = 0.0 | ! |
| ! A116 | A(25,29,28)  | 102.7427 | -DE/DX = 0.0 | ! |
| ! A117 | A(25,29,51)  | 112.987  | -DE/DX = 0.0 | ! |
| ! A118 | A(25,29,52)  | 110.7988 | -DE/DX = 0.0 | ! |
| ! A119 | A(28,29,51)  | 110.1297 | -DE/DX = 0.0 | ! |
| ! A120 | A(28,29,52)  | 112.7115 | -DE/DX = 0.0 | ! |
| ! A121 | A(51,29,52)  | 107.5367 | -DE/DX = 0.0 | ! |
| ! D1   | D(13,1,2,3)  | -23.5241 | -DE/DX = 0.0 | ! |
| ! D2   | D(13,1,2,4)  | -0.6891  | -DE/DX = 0.0 | ! |
| ! D3   | D(13,1,2,11) | 127.037  | -DE/DX = 0.0 | ! |
| ! D4   | D(25,1,2,3)  | -148.918 | -DE/DX = 0.0 | ! |
| ! D5   | D(25,1,2,4)  | -126.083 | -DE/DX = 0.0 | ! |
| ! D6   | D(25,1,2,11) | 1.6431   | -DE/DX = 0.0 | ! |
| ! D7   | D(53,1,2,3)  | 91.7181  | -DE/DX = 0.0 | ! |

|       |               |           |              |   |
|-------|---------------|-----------|--------------|---|
| ! D8  | D(53,1,2,4)   | 114.553   | -DE/DX = 0.0 | ! |
| ! D9  | D(53,1,2,11)  | -117.7208 | -DE/DX = 0.0 | ! |
| ! D10 | D(2,1,13,5)   | 1.6706    | -DE/DX = 0.0 | ! |
| ! D11 | D(2,1,13,24)  | 179.5946  | -DE/DX = 0.0 | ! |
| ! D12 | D(25,1,13,5)  | 129.308   | -DE/DX = 0.0 | ! |
| ! D13 | D(25,1,13,24) | -52.768   | -DE/DX = 0.0 | ! |
| ! D14 | D(53,1,13,5)  | -109.8239 | -DE/DX = 0.0 | ! |
| ! D15 | D(53,1,13,24) | 68.1002   | -DE/DX = 0.0 | ! |
| ! D16 | D(2,1,25,26)  | 73.1474   | -DE/DX = 0.0 | ! |
| ! D17 | D(2,1,25,29)  | -94.2352  | -DE/DX = 0.0 | ! |
| ! D18 | D(13,1,25,26) | -44.9534  | -DE/DX = 0.0 | ! |
| ! D19 | D(13,1,25,29) | 147.664   | -DE/DX = 0.0 | ! |
| ! D20 | D(53,1,25,26) | -167.9801 | -DE/DX = 0.0 | ! |
| ! D21 | D(53,1,25,29) | 24.6373   | -DE/DX = 0.0 | ! |
| ! D22 | D(1,2,3,16)   | 109.6266  | -DE/DX = 0.0 | ! |
| ! D23 | D(1,2,3,30)   | -105.4971 | -DE/DX = 0.0 | ! |
| ! D24 | D(11,2,3,16)  | -45.2137  | -DE/DX = 0.0 | ! |
| ! D25 | D(11,2,3,30)  | 99.6626   | -DE/DX = 0.0 | ! |
| ! D26 | D(1,2,4,5)    | -0.496    | -DE/DX = 0.0 | ! |
| ! D27 | D(1,2,4,12)   | 106.2322  | -DE/DX = 0.0 | ! |
| ! D28 | D(11,2,4,5)   | -134.779  | -DE/DX = 0.0 | ! |
| ! D29 | D(11,2,4,12)  | -28.0507  | -DE/DX = 0.0 | ! |
| ! D30 | D(1,2,11,6)   | -105.7782 | -DE/DX = 0.0 | ! |
| ! D31 | D(1,2,11,10)  | 77.2378   | -DE/DX = 0.0 | ! |
| ! D32 | D(3,2,11,6)   | 53.7497   | -DE/DX = 0.0 | ! |
| ! D33 | D(3,2,11,10)  | -123.2343 | -DE/DX = 0.0 | ! |
| ! D34 | D(4,2,11,6)   | 21.7025   | -DE/DX = 0.0 | ! |
| ! D35 | D(4,2,11,10)  | -155.2814 | -DE/DX = 0.0 | ! |

|       |               |           |              |   |
|-------|---------------|-----------|--------------|---|
| ! D36 | D(16,3,4,5)   | 77.9573   | -DE/DX = 0.0 | ! |
| ! D37 | D(16,3,4,12)  | -39.2994  | -DE/DX = 0.0 | ! |
| ! D38 | D(30,3,4,5)   | -107.4453 | -DE/DX = 0.0 | ! |
| ! D39 | D(30,3,4,12)  | 135.2981  | -DE/DX = 0.0 | ! |
| ! D40 | D(2,3,16,5)   | -65.3424  | -DE/DX = 0.0 | ! |
| ! D41 | D(2,3,16,15)  | -25.18    | -DE/DX = 0.0 | ! |
| ! D42 | D(2,3,16,20)  | 157.3565  | -DE/DX = 0.0 | ! |
| ! D43 | D(4,3,16,5)   | -28.5002  | -DE/DX = 0.0 | ! |
| ! D44 | D(4,3,16,15)  | 11.6623   | -DE/DX = 0.0 | ! |
| ! D45 | D(4,3,16,20)  | -165.8012 | -DE/DX = 0.0 | ! |
| ! D46 | D(30,3,16,5)  | 157.2408  | -DE/DX = 0.0 | ! |
| ! D47 | D(30,3,16,15) | -162.5968 | -DE/DX = 0.0 | ! |
| ! D48 | D(30,3,16,20) | 19.9398   | -DE/DX = 0.0 | ! |
| ! D49 | D(2,4,5,13)   | 1.6231    | -DE/DX = 0.0 | ! |
| ! D50 | D(2,4,5,15)   | 155.9195  | -DE/DX = 0.0 | ! |
| ! D51 | D(2,4,5,16)   | -175.7282 | -DE/DX = 0.0 | ! |
| ! D52 | D(2,4,5,21)   | -177.0478 | -DE/DX = 0.0 | ! |
| ! D53 | D(3,4,5,13)   | 145.7184  | -DE/DX = 0.0 | ! |
| ! D54 | D(3,4,5,15)   | -59.9852  | -DE/DX = 0.0 | ! |
| ! D55 | D(3,4,5,16)   | -31.6329  | -DE/DX = 0.0 | ! |
| ! D56 | D(3,4,5,21)   | -32.9524  | -DE/DX = 0.0 | ! |
| ! D57 | D(12,4,5,13)  | -98.4025  | -DE/DX = 0.0 | ! |
| ! D58 | D(12,4,5,15)  | 55.8939   | -DE/DX = 0.0 | ! |
| ! D59 | D(12,4,5,16)  | 84.2462   | -DE/DX = 0.0 | ! |
| ! D60 | D(12,4,5,21)  | 82.9267   | -DE/DX = 0.0 | ! |
| ! D61 | D(2,4,12,6)   | 30.6458   | -DE/DX = 0.0 | ! |
| ! D62 | D(2,4,12,14)  | 165.1608  | -DE/DX = 0.0 | ! |
| ! D63 | D(2,4,12,35)  | -78.4113  | -DE/DX = 0.0 | ! |

|       |               |           |              |   |
|-------|---------------|-----------|--------------|---|
| ! D64 | D(3,4,12,6)   | -84.705   | -DE/DX = 0.0 | ! |
| ! D65 | D(3,4,12,14)  | 49.81     | -DE/DX = 0.0 | ! |
| ! D66 | D(3,4,12,35)  | 166.2378  | -DE/DX = 0.0 | ! |
| ! D67 | D(5,4,12,6)   | 142.4123  | -DE/DX = 0.0 | ! |
| ! D68 | D(5,4,12,14)  | -83.0727  | -DE/DX = 0.0 | ! |
| ! D69 | D(5,4,12,35)  | 33.3551   | -DE/DX = 0.0 | ! |
| ! D70 | D(4,5,13,1)   | -2.1212   | -DE/DX = 0.0 | ! |
| ! D71 | D(4,5,13,24)  | 179.7537  | -DE/DX = 0.0 | ! |
| ! D72 | D(15,5,13,1)  | -50.4732  | -DE/DX = 0.0 | ! |
| ! D73 | D(15,5,13,24) | 131.4017  | -DE/DX = 0.0 | ! |
| ! D74 | D(16,5,13,1)  | 1.5133    | -DE/DX = 0.0 | ! |
| ! D75 | D(16,5,13,24) | -176.6118 | -DE/DX = 0.0 | ! |
| ! D76 | D(21,5,13,1)  | 176.6525  | -DE/DX = 0.0 | ! |
| ! D77 | D(21,5,13,24) | -1.4727   | -DE/DX = 0.0 | ! |
| ! D78 | D(4,5,15,14)  | -90.1496  | -DE/DX = 0.0 | ! |
| ! D79 | D(4,5,15,17)  | 160.9195  | -DE/DX = 0.0 | ! |
| ! D80 | D(13,5,15,14) | -29.2978  | -DE/DX = 0.0 | ! |
| ! D81 | D(13,5,15,17) | -138.2286 | -DE/DX = 0.0 | ! |
| ! D82 | D(21,5,15,14) | 111.1972  | -DE/DX = 0.0 | ! |
| ! D83 | D(21,5,15,17) | 2.2664    | -DE/DX = 0.0 | ! |
| ! D84 | D(4,5,16,3)   | 37.6319   | -DE/DX = 0.0 | ! |
| ! D85 | D(4,5,16,20)  | 117.0817  | -DE/DX = 0.0 | ! |
| ! D86 | D(13,5,16,3)  | 32.4498   | -DE/DX = 0.0 | ! |
| ! D87 | D(13,5,16,20) | 111.8996  | -DE/DX = 0.0 | ! |
| ! D88 | D(21,5,16,3)  | -143.4063 | -DE/DX = 0.0 | ! |
| ! D89 | D(21,5,16,20) | -63.9565  | -DE/DX = 0.0 | ! |
| ! D90 | D(4,5,21,22)  | 179.9674  | -DE/DX = 0.0 | ! |
| ! D91 | D(4,5,21,41)  | 0.3888    | -DE/DX = 0.0 | ! |



|        |               |           |              |   |
|--------|---------------|-----------|--------------|---|
| ! D92  | D(13,5,21,22) | 1.4324    | -DE/DX = 0.0 | ! |
| ! D93  | D(13,5,21,41) | -178.1461 | -DE/DX = 0.0 | ! |
| ! D94  | D(15,5,21,22) | -158.1894 | -DE/DX = 0.0 | ! |
| ! D95  | D(15,5,21,41) | 22.2321   | -DE/DX = 0.0 | ! |
| ! D96  | D(16,5,21,22) | 179.0969  | -DE/DX = 0.0 | ! |
| ! D97  | D(16,5,21,41) | -0.4817   | -DE/DX = 0.0 | ! |
| ! D98  | D(11,6,7,8)   | 0.5985    | -DE/DX = 0.0 | ! |
| ! D99  | D(11,6,7,31)  | -179.4317 | -DE/DX = 0.0 | ! |
| ! D100 | D(12,6,7,8)   | 169.3483  | -DE/DX = 0.0 | ! |
| ! D101 | D(12,6,7,31)  | -10.6819  | -DE/DX = 0.0 | ! |
| ! D102 | D(7,6,11,2)   | -178.842  | -DE/DX = 0.0 | ! |
| ! D103 | D(7,6,11,10)  | -1.9177   | -DE/DX = 0.0 | ! |
| ! D104 | D(12,6,11,2)  | 13.6469   | -DE/DX = 0.0 | ! |
| ! D105 | D(12,6,11,10) | -169.4288 | -DE/DX = 0.0 | ! |
| ! D106 | D(7,6,12,4)   | 168.5756  | -DE/DX = 0.0 | ! |
| ! D107 | D(7,6,12,14)  | 94.7672   | -DE/DX = 0.0 | ! |
| ! D108 | D(7,6,12,35)  | -55.2519  | -DE/DX = 0.0 | ! |
| ! D109 | D(11,6,12,4)  | -23.7826  | -DE/DX = 0.0 | ! |
| ! D110 | D(11,6,12,14) | -97.591   | -DE/DX = 0.0 | ! |
| ! D111 | D(11,6,12,35) | 112.3899  | -DE/DX = 0.0 | ! |
| ! D112 | D(6,7,8,9)    | 0.0818    | -DE/DX = 0.0 | ! |
| ! D113 | D(6,7,8,32)   | 179.1635  | -DE/DX = 0.0 | ! |
| ! D114 | D(31,7,8,9)   | -179.8877 | -DE/DX = 0.0 | ! |
| ! D115 | D(31,7,8,32)  | -0.806    | -DE/DX = 0.0 | ! |
| ! D116 | D(7,8,9,10)   | 0.5469    | -DE/DX = 0.0 | ! |
| ! D117 | D(7,8,9,33)   | 179.2036  | -DE/DX = 0.0 | ! |
| ! D118 | D(32,8,9,10)  | -178.5287 | -DE/DX = 0.0 | ! |
| ! D119 | D(32,8,9,33)  | 0.128     | -DE/DX = 0.0 | ! |

|        |                |           |              |   |
|--------|----------------|-----------|--------------|---|
| ! D120 | D(8,9,10,11)   | -1.9054   | -DE/DX = 0.0 | ! |
| ! D121 | D(8,9,10,34)   | 177.1759  | -DE/DX = 0.0 | ! |
| ! D122 | D(33,9,10,11)  | 179.4289  | -DE/DX = 0.0 | ! |
| ! D123 | D(33,9,10,34)  | -1.4898   | -DE/DX = 0.0 | ! |
| ! D124 | D(9,10,11,2)   | 179.6482  | -DE/DX = 0.0 | ! |
| ! D125 | D(9,10,11,6)   | 2.6215    | -DE/DX = 0.0 | ! |
| ! D126 | D(34,10,11,2)  | 0.5456    | -DE/DX = 0.0 | ! |
| ! D127 | D(34,10,11,6)  | -176.4811 | -DE/DX = 0.0 | ! |
| ! D128 | D(4,12,14,15)  | -38.7577  | -DE/DX = 0.0 | ! |
| ! D129 | D(4,12,14,36)  | 140.3843  | -DE/DX = 0.0 | ! |
| ! D130 | D(6,12,14,15)  | 30.7043   | -DE/DX = 0.0 | ! |
| ! D131 | D(6,12,14,36)  | -150.1537 | -DE/DX = 0.0 | ! |
| ! D132 | D(35,12,14,15) | -178.6687 | -DE/DX = 0.0 | ! |
| ! D133 | D(35,12,14,36) | 0.4733    | -DE/DX = 0.0 | ! |
| ! D134 | D(1,13,24,23)  | -177.3549 | -DE/DX = 0.0 | ! |
| ! D135 | D(1,13,24,44)  | 2.0518    | -DE/DX = 0.0 | ! |
| ! D136 | D(5,13,24,23)  | 0.395     | -DE/DX = 0.0 | ! |
| ! D137 | D(5,13,24,44)  | 179.8017  | -DE/DX = 0.0 | ! |
| ! D138 | D(12,14,15,5)  | 58.5262   | -DE/DX = 0.0 | ! |
| ! D139 | D(12,14,15,16) | 13.3295   | -DE/DX = 0.0 | ! |
| ! D140 | D(12,14,15,17) | -163.2633 | -DE/DX = 0.0 | ! |
| ! D141 | D(36,14,15,5)  | -120.6186 | -DE/DX = 0.0 | ! |
| ! D142 | D(36,14,15,16) | -165.8153 | -DE/DX = 0.0 | ! |
| ! D143 | D(36,14,15,17) | 17.5919   | -DE/DX = 0.0 | ! |
| ! D144 | D(14,15,16,3)  | 19.8499   | -DE/DX = 0.0 | ! |
| ! D145 | D(14,15,16,20) | -162.5812 | -DE/DX = 0.0 | ! |
| ! D146 | D(17,15,16,3)  | -163.6647 | -DE/DX = 0.0 | ! |
| ! D147 | D(17,15,16,20) | 13.9042   | -DE/DX = 0.0 | ! |

|        |                |           |              |   |
|--------|----------------|-----------|--------------|---|
| ! D148 | D(5,15,17,18)  | -99.9029  | -DE/DX = 0.0 | ! |
| ! D149 | D(5,15,17,37)  | 83.403    | -DE/DX = 0.0 | ! |
| ! D150 | D(14,15,17,18) | 167.885   | -DE/DX = 0.0 | ! |
| ! D151 | D(14,15,17,37) | -8.8092   | -DE/DX = 0.0 | ! |
| ! D152 | D(16,15,17,18) | -8.8583   | -DE/DX = 0.0 | ! |
| ! D153 | D(16,15,17,37) | 174.4476  | -DE/DX = 0.0 | ! |
| ! D154 | D(3,16,20,19)  | 167.5686  | -DE/DX = 0.0 | ! |
| ! D155 | D(3,16,20,40)  | -9.1573   | -DE/DX = 0.0 | ! |
| ! D156 | D(5,16,20,19)  | 115.5472  | -DE/DX = 0.0 | ! |
| ! D157 | D(5,16,20,40)  | -61.1787  | -DE/DX = 0.0 | ! |
| ! D158 | D(15,16,20,19) | -10.1004  | -DE/DX = 0.0 | ! |
| ! D159 | D(15,16,20,40) | 173.1736  | -DE/DX = 0.0 | ! |
| ! D160 | D(15,17,18,19) | -0.9216   | -DE/DX = 0.0 | ! |
| ! D161 | D(15,17,18,38) | -178.9896 | -DE/DX = 0.0 | ! |
| ! D162 | D(37,17,18,19) | 175.7185  | -DE/DX = 0.0 | ! |
| ! D163 | D(37,17,18,38) | -2.3495   | -DE/DX = 0.0 | ! |
| ! D164 | D(17,18,19,20) | 5.046     | -DE/DX = 0.0 | ! |
| ! D165 | D(17,18,19,39) | -176.0539 | -DE/DX = 0.0 | ! |
| ! D166 | D(38,18,19,20) | -176.8838 | -DE/DX = 0.0 | ! |
| ! D167 | D(38,18,19,39) | 2.0163    | -DE/DX = 0.0 | ! |
| ! D168 | D(18,19,20,16) | 0.7964    | -DE/DX = 0.0 | ! |
| ! D169 | D(18,19,20,40) | 177.4262  | -DE/DX = 0.0 | ! |
| ! D170 | D(39,19,20,16) | -178.0993 | -DE/DX = 0.0 | ! |
| ! D171 | D(39,19,20,40) | -1.4695   | -DE/DX = 0.0 | ! |
| ! D172 | D(5,21,22,23)  | -0.3684   | -DE/DX = 0.0 | ! |
| ! D173 | D(5,21,22,42)  | 179.7413  | -DE/DX = 0.0 | ! |
| ! D174 | D(41,21,22,23) | 179.2069  | -DE/DX = 0.0 | ! |
| ! D175 | D(41,21,22,42) | -0.6834   | -DE/DX = 0.0 | ! |

|        |                |           |              |   |
|--------|----------------|-----------|--------------|---|
| ! D176 | D(21,22,23,24) | -0.6616   | -DE/DX = 0.0 | ! |
| ! D177 | D(21,22,23,43) | 179.9392  | -DE/DX = 0.0 | ! |
| ! D178 | D(42,22,23,24) | 179.2281  | -DE/DX = 0.0 | ! |
| ! D179 | D(42,22,23,43) | -0.171    | -DE/DX = 0.0 | ! |
| ! D180 | D(22,23,24,13) | 0.6459    | -DE/DX = 0.0 | ! |
| ! D181 | D(22,23,24,44) | -178.7558 | -DE/DX = 0.0 | ! |
| ! D182 | D(43,23,24,13) | -179.955  | -DE/DX = 0.0 | ! |
| ! D183 | D(43,23,24,44) | 0.6433    | -DE/DX = 0.0 | ! |
| ! D184 | D(1,25,26,27)  | -165.1491 | -DE/DX = 0.0 | ! |
| ! D185 | D(1,25,26,45)  | -44.5549  | -DE/DX = 0.0 | ! |
| ! D186 | D(1,25,26,46)  | 75.1718   | -DE/DX = 0.0 | ! |
| ! D187 | D(29,25,26,27) | 3.399     | -DE/DX = 0.0 | ! |
| ! D188 | D(29,25,26,45) | 123.9932  | -DE/DX = 0.0 | ! |
| ! D189 | D(29,25,26,46) | -116.2801 | -DE/DX = 0.0 | ! |
| ! D190 | D(1,25,29,28)  | -170.9991 | -DE/DX = 0.0 | ! |
| ! D191 | D(1,25,29,51)  | 70.3676   | -DE/DX = 0.0 | ! |
| ! D192 | D(1,25,29,52)  | -50.3798  | -DE/DX = 0.0 | ! |
| ! D193 | D(26,25,29,28) | 20.366    | -DE/DX = 0.0 | ! |
| ! D194 | D(26,25,29,51) | -98.2673  | -DE/DX = 0.0 | ! |
| ! D195 | D(26,25,29,52) | 140.9854  | -DE/DX = 0.0 | ! |
| ! D196 | D(25,26,27,28) | -25.7691  | -DE/DX = 0.0 | ! |
| ! D197 | D(25,26,27,47) | 91.3204   | -DE/DX = 0.0 | ! |
| ! D198 | D(25,26,27,48) | -148.5729 | -DE/DX = 0.0 | ! |
| ! D199 | D(45,26,27,28) | -146.6265 | -DE/DX = 0.0 | ! |
| ! D200 | D(45,26,27,47) | -29.537   | -DE/DX = 0.0 | ! |
| ! D201 | D(45,26,27,48) | 90.5697   | -DE/DX = 0.0 | ! |
| ! D202 | D(46,26,27,28) | 93.417    | -DE/DX = 0.0 | ! |
| ! D203 | D(46,26,27,47) | -149.4936 | -DE/DX = 0.0 | ! |
